1 **Transcriptome analysis of FOXO-dependent hypoxia gene expression identifies**  
2 **Hipk as a regulator of low oxygen tolerance in *Drosophila***

3

4 Kate Ding, Elizabeth C Barretto, Michael Johnston, Byoungchun Lee, Marco Gallo, and Savraj S  
5 Grewal

6

7 Clark H Smith Brain Tumour Centre, Arnie Charbonneau Cancer Institute, Alberta Children's Hospital  
8 Research Institute, and Department of Biochemistry and Molecular Biology Calgary, University of  
9 Calgary, Alberta T2N 4N1, Canada.

10

11 Author for correspondence: SSG ([grewalss@ucalgary.ca](mailto:grewalss@ucalgary.ca))

12

13 Running head: Transcriptomic analysis of hypoxia in *Drosophila*

14

15

16 **Keywords:** *Drosophila*, transcriptome, hypoxia, FOXO, Hipk, kinase, Hippo pathway, transcription,  
17 ribosome, mitochondria

## 18 Summary

19

20 When exposed to low oxygen or hypoxia, animals must alter their metabolism and physiology to ensure  
21 proper cell-, tissue- and whole-body level adaptations to their hypoxic environment. These alterations  
22 often involve changes in gene expression. While extensive work has emphasized the importance of the  
23 HIF-1 alpha transcription factor on controlling hypoxia gene expression, less is known about other  
24 transcriptional mechanisms. We previously identified the transcription factor FOXO as a regulator of  
25 hypoxia tolerance in *Drosophila* larvae and adults. Here we use an RNA-sequencing approach to  
26 identify FOXO-dependent changes in gene expression that are associated with these tolerance effects.  
27 We found that hypoxia altered the expression of over 2000 genes and that approximately 40% of these  
28 gene expression changes required FOXO. We discovered that hypoxia exposure led to a FOXO-  
29 dependent increase in genes involved in cell signaling, such as kinases, GTPase regulators, and  
30 regulators of the Hippo/Yorkie pathway. Among these, we identified homeodomain-interacting protein  
31 kinase (Hipk) as being required for hypoxia survival. We also found that hypoxia suppresses the  
32 expression of genes involved in ribosome synthesis and egg production, and we showed that hypoxia  
33 suppresses tRNA synthesis and mRNA translation and reduces female fecundity. Among the  
34 downregulated genes, we discovered that FOXO was required for suppression of many ribosomal  
35 protein genes and genes involved in oxidative phosphorylation, pointing to a role for FOXO in limiting  
36 energetically costly processes such as protein synthesis and mitochondrial activity upon hypoxic stress.  
37 This work uncovers a widespread role for FOXO in mediating hypoxia changes in gene expression.

38

## 39 Introduction

40

41 Animals often live in conditions where environmental oxygen levels fluctuate (CLEGG 1997; DANOVARO  
42 *et al.* 2010; PARK *et al.* 2017). As a result, they must coordinate their physiology and metabolism with  
43 changes in oxygen availability to maintain proper homeostasis. This coordination can occur through  
44 alterations in gene expression and is essential for ensuring organismal survival in low oxygen (BICKLER  
45 AND BUCK 2007; RAMIREZ *et al.* 2007; HARRISON AND HADDAD 2011; PADILLA AND LADAGE 2012;  
46 NAKAZAWA *et al.* 2016; SAMANTA *et al.* 2017; HARRISON *et al.* 2018; SCHITO AND REY 2018;  
47 HOLDSWORTH AND GIBBS 2020).

48

49 Across all metazoans, perhaps the best-described and most intensively studied mechanism of gene  
50 regulation in hypoxia involves the HIF-1 alpha transcription factor (SEMENZA 2011; SEMENZA 2014b).  
51 When cells encounter low oxygen conditions, HIF-1 alpha protein is stabilized and translocates to the  
52 nucleus to induce gene expression. HIF-1 alpha-regulated genes encompass a diverse array of genes

53 that are involved in biological processes such as metabolism, cell signaling and transcription, and that  
54 together coordinate cell-, tissue- and whole-body level adaptations to low oxygen (SEMENZA 2011;  
55 SAMANTA *et al.* 2017). Studies in model organisms have identified how HIF-1 alpha is a key regulator of  
56 hypoxia in both normal physiology and in pathological disease states (SEMENZA 2014a; SEMENZA  
57 2014b). However, compared to our understanding of HIF-1 alpha biology, less is known about other  
58 transcriptional mechanisms that contribute to both cellular and systemic oxygen homeostasis.

59  
60 *Drosophila* have provided a versatile and informative model system for investigating organismal  
61 responses to hypoxia. In their natural ecology, *Drosophila* live and grow on rotting, fermenting food rich  
62 in microorganisms - an environment characterized by low ambient oxygen (CALLIER *et al.* 2015;  
63 MARKOW 2015; HARRISON *et al.* 2018). They have therefore evolved mechanisms to tolerate hypoxia.  
64 For example, larvae and adults can tolerate severe hypoxia (~1% oxygen) for up to 24 hours with little  
65 impact on viability (BARRETTO *et al.* 2020), while embryos can survive complete anoxia (0% oxygen) for  
66 several days (FOE AND ALBERTS 1985; TEODORO AND O'FARRELL 2003). Genetic studies have shown  
67 that flies can survive oxygen deprivation by increasing tracheal branching to expand oxygen supply to  
68 tissues (CENTANIN *et al.* 2008; WONG *et al.* 2014), and by remodelling their physiology and metabolism  
69 through both HIF-1 alpha-dependent and independent mechanisms (WINGROVE AND O'FARRELL 1999;  
70 LAVISTA-LLANOS *et al.* 2002; TEODORO AND O'FARRELL 2003; CENTANIN *et al.* 2005; ROMERO *et al.* 2007;  
71 HARRISON AND HADDAD 2011; MORTON 2011; LI *et al.* 2013; BANDARRA *et al.* 2014; HARRISON *et al.*  
72 2018; LEE *et al.* 2019; TEXADA *et al.* 2019; BARRETTO *et al.* 2020). Relatively few studies, however, have  
73 used genome-wide approaches to identify gene expression changes associated with adaptation to  
74 hypoxia in *Drosophila* (LIU *et al.* 2006a; LI *et al.* 2013). One study examined transcriptome changes  
75 associated with larval hypoxia and identified widespread changes in metabolic and gene expression (LI  
76 *et al.* 2013). This study also showed that of the hundreds of gene expression changes, over half were  
77 independent of HIF-1 alpha, emphasizing the importance of additional transcriptional mechanisms in  
78 the control of hypoxia gene expression (LI *et al.* 2013).

79  
80 Using *Drosophila* larvae and adults, we previously identified the transcription factor, Forkhead Box O  
81 (FOXO), as a regulator of hypoxia tolerance (BARRETTO *et al.* 2020). FOXO is a conserved regulator of  
82 stress responses and animal aging (WEBB AND BRUNET 2014). Studies in *Drosophila* have shown it is  
83 induced by stressors such as starvation, oxidative stress, pathogens, and ionizing radiation (JUNGER *et al.*  
84 2003; DIONNE *et al.* 2006; KARPAC *et al.* 2009; KARPAC *et al.* 2011; BORCH JENSEN *et al.* 2017).  
85 Genetic studies have also shown that, in general, loss of *foxo* induces stress sensitivity and shortens  
86 lifespan whereas increased FOXO activity, particularly in tissues such as gut, muscle and fat body can  
87 promote stress resistance and extend lifespan (GIANNAKOU *et al.* 2004; HWANGBO *et al.* 2004;  
88 TETTWEILER *et al.* 2005; KRAMER *et al.* 2008; DEMONTIS AND PERRIMON 2010; ALIC *et al.* 2014a; ALIC *et*

89 *al.* 2014b; DOBSON *et al.* 2017). We showed that FOXO activity is rapidly induced in hypoxia and that it  
90 is needed for hypoxia survival in both larvae and adults. We also identified the immune Relish/NF  
91 Kappa B transcription factor as one target of FOXO important for its hypoxia tolerance effects.  
92 However, it is unclear what other genes FOXO may regulate in hypoxia. Previous studies have shown  
93 that under normal conditions FOXO can bind to thousands of genomic loci (ALIC *et al.* 2011; BIRNBAUM  
94 *et al.* 2019) and can regulate the expression of hundreds of genes in a tissue- and context-specific  
95 manner (ALIC *et al.* 2011; ALIC *et al.* 2014a; ALIC *et al.* 2014b), raising the possibility that it may mediate  
96 broad effects on gene expression in hypoxia.

97  
98 In this report we describe our transcriptome analysis of hypoxia-mediated gene expression changes  
99 upon hypoxia in adult flies. We show that FOXO is required for upregulation of genes involved in cell  
100 signaling and we identify the kinase Hipk as a regulator of hypoxia tolerance. We also see that FOXO  
101 suppresses expression of genes involved in protein synthesis and mitochondrial activity, suggesting it  
102 plays an important role in limiting energetically costly processes in low oxygen stress.

## 103 104 **Material and Methods**

### 105 106 ***Drosophila* Stocks and Culturing**

107 Flies were grown on medium containing 150 g agar, 1600 g cornmeal, 770 g Torula yeast, 675 g  
108 sucrose, 2340 g D-glucose, 240 ml acid mixture (propionic acid/phosphoric acid) per 34 L water. All  
109 stocks were maintained at either 18°C or RT. For adult hypoxia exposures, flies were raised from  
110 embryos to adults at 25°C and then, following eclosion, females were allowed to mate for 2 days before  
111 being separated from males and aged for another 5-6 days, at which time point hypoxia experiments  
112 were performed. For larval hypoxia exposures, hatched larvae were grown on food at 25°C until 96hrs  
113 after egg-laying, at which time point hypoxia experiments were performed. The following *Drosophila*  
114 strains were used: *w<sup>1118</sup>*, *foxo<sup>D94</sup>/TM6B*, *UAS-hipk* RNAi, *da-GS-Gal4* (*daughterless-GeneSwitch*). For  
115 UAS gene induction using the GeneSwitch system, adult flies were fed food supplemented with RU486  
116 (200µM) for seven days. Control (non-induced flies) were maintained on normal food supplemented  
117 with ethanol (vehicle control for RU486).

### 118 119 **Hypoxia exposure and measurement of hypoxia survival**

120 Vials of adult flies or larvae were placed into an airtight glass chamber into which a mix of 1%  
121 oxygen/99% nitrogen gas continually flowed. Flow rate was controlled using an Aalborg model P gas  
122 flow meter. Normoxic animals were maintained in vials in ambient air. For hypoxia survival experiments,  
123 mated female adults were placed in placed into hypoxia (1% oxygen) for 20 hours in groups of 15 flies

124 per vial. Then, vials were removed from hypoxia and the flies were allowed to recover before the  
125 numbers of dead flies were counted.

126

### 127 **Total RNA isolation**

128 Adult flies (5 per group), adult tissues (from 10 animals per group), or larvae (10 per group) were snap  
129 frozen on dry ice. Total RNA was then isolated using Trizol according to the manufacturer's instructions  
130 (Invitrogen; 15596-018). Extracted RNA was then DNase treated (Ambion; 2238G) to be used for  
131 subsequent qPCR or mRNA-sequencing.

132

### 133 **mRNA-sequencing and RNA-seq analyses**

134 Three to four independent biological replicates (5 flies per group) of normoxia- and hypoxia-exposed  
135 groups of *w<sup>1118</sup>* and *foxo* mutants were prepared and analyzed. RNA-sequencing was conducted by the  
136 University of Calgary Centre for Health Genomics and Informatics. The RNA Integrity Number (RIN)  
137 was determined for each RNA sample. Samples with a RIN score higher than 8 were considered good  
138 quality, and Poly-A mRNA-seq libraries from such samples were prepared using the Ultra II Directional  
139 RNA Library kit (New England BioLabs) according to the manufacturer's instructions. Libraries were  
140 then quantified using the Kapa qPCR Library Quantitation kit (Roche) according to the manufacturer's  
141 directions. Finally, RNA libraries were sequenced for 100 cycles using the NextSeq 500 Sequencing  
142 System (Illumina). Transcripts were quantified using kallisto (BRAY *et al.* 2016) referencing refSeq  
143 mRNA (release: 2019-Oct-15) corresponding to dm6 annotation. Differential expression testing was  
144 performed using sleuth (PIMENTEL *et al.* 2017).

145

### 146 **Gene Ontology, KEGG pathway, and tissue expression analyses**

147 Analyses of Gene Ontology and KEGG pathway enrichment of up- and down-regulated genes (>1.5-  
148 fold, q-val (FDR corrected p-val) <0.05) were performed using G-profiler (RAUDVERE *et al.* 2019) and  
149 Revigo (SUPEK *et al.* 2011).

150

### 151 **Quantitative RT-PCR measurements**

152 Total RNA was extracted from either whole flies, whole larvae, or isolated adult tissues. The RNA was  
153 then DNase treated as described above and reverse transcribed using Superscript II (Invitrogen;  
154 100004925). The generated cDNA was used as a template to perform qRT-PCRs (ABI 7500 real time  
155 PCR system using SyBr Green PCR mix) using gene-specific primers. PCR data were normalized to  
156 *beta tubulin* or *eIF2 alpha* mRNA levels. The following primers were used:

157

158 *tRNA ala* Forward: GCGGCCGCACTTTCCTGACCGGAAACG

159 *tRNA ala* Reverse: GCGGCCGCGCCCGTTCTAACTTTTTGGA

160 *tRNA arg* Forward: GCGGCCGCGTCCGTCCACCAATGAA AAT  
161 *tRNA arg* Reverse: GCGGCCGCCGGCTAGCTCAGTCGGT AGA  
162 *tRNA eMet* Forward: GCGGCCGCCGTGGCAATCTTCTGAA ACC  
163 *tRNA eMet* Reverse: GCGGCCGCTCAGTGGAAAACCATA TGTTCCG  
164 *tRNA iMet* Forward: AGAGTGGCGCAGTGGAAG  
165 *tRNA iMet* Reverse: AGAGCAAGGTTTCGATCCTC  
166 *beta tubulin* Forward: ATCATCACACACGGACAGG  
167 *beta tubulin* Reverse: GAGCTGGATGATGGGGAGTA  
168 *Hipk* Forward: CAACAATGTCAAGGCATC  
169 *Hipk* Reverse: CAGGCTGCACAGTGTGGAAA  
170 *eIF2 alpha* Forward: TCTTCGATGAGTGCAACCTG  
171 *eIF2 alpha* Reverse: CCTCGTAACCGTAGCAGGAG

172

### 173 **Statistical analysis of qRT-PCR data**

174 All qRT-PCR data were analyzed by Student's t-test or two-way ANOVA followed by post-hoc Students'  
175 t-test where appropriate. All statistical analyses and data plots were performed using Prism statistical  
176 software. Differences were considered significant when p values were less than 0.05.

177

### 178 **Polysome Profiling**

179 Larvae were lysed in lysis buffer (25 mM Tris pH 7.4, 10 mM MgCl<sub>2</sub>, 250 mM NaCl, 1% Triton X-100,  
180 0.5% sodium deoxycholate, 0.5 mM DTT, 100 mg/ml cycloheximide, 1 mg/ml heparin, 16 Complete mini  
181 roche protease inhibitor, 2.5 mM PMSF, 5 mM sodium fluoride, 1 mM sodium orthovanadate and 200  
182 U/ml ribolock RNase inhibitor (Fermentas)) using a Dounce homogenizer. Lysates were then  
183 centrifuged at 15,000 rpm for 20 minutes and the supernatant was removed carefully using a fine  
184 syringe to avoid the floating fat content. For each condition, lysates containing 300 mg of total RNA  
185 were then layered on top of a 15–45% w/w sucrose gradient (made using 25 mM Tris pH 7.4, 10 mM  
186 MgCl<sub>2</sub>, 250 mM NaCl, 1 mg/ml heparin, 100 mg/ml cycloheximide in 12 ml polyallomer tube) and  
187 centrifuged at 37,000 rpm for 150 minutes in a Beckmann Coulter Optima L-90K ultracentrifuge using a  
188 SW-41 rotor. Polysome profiles were obtained by pushing the gradient using 70% w/v sucrose pumped  
189 at 1.5 ml/min into a continuous OD254 nm reader (ISCO UA6 UV detector).

190

### 191 **Fecundity Assay**

192 1-2 day old virgin *w<sup>118</sup>* females were allowed to mate with males for 2 days and then the females were  
193 separated and either maintained in normoxia (controls) or exposed to hypoxia for either 8 or 12 hours  
194 before being returned to normoxia. Twenty four hours later, the females were transferred in groups of 3  
195 to new vials and allowed to lay eggs for a 24 hour period (day 1), and then transferred to a second set



196 of vials to lay eggs for a further 24 hour period (day 2). Fecundity was then assessed by measuring the  
197 number of viable pupae per female that emerged from eggs laid on day 1 and day 2.

198

## 199 Results

200

### 201 Hypoxia leads to upregulation of transcription factor and kinase gene expression.

202

203 Adult mated  $w^{1118}$  (control) or  $foxo^{A94}$  (*foxo* null mutant)(SLACK *et al.* 2011) females were either  
204 maintained in normoxia or exposed to hypoxia (1% oxygen) for 16 hours and we then isolated whole-  
205 body RNA for RNA-seq analysis (Figure 1A). We first examined the gene expression changes induced  
206 by hypoxia in the control animals. Using a cut-off of +/-1.5 fold and a false-discovery rate corrected p-  
207 value <0.05, we identified 1081 genes with reduced mRNA expression and 1257 genes with increased  
208 mRNA expression in  $w^{1118}$  animals (Figure 1B, Supplemental Table 1). Among the upregulated genes,  
209 we saw increased expression of several genes previously shown to be induced upon hypoxia exposure  
210 in larvae and/or adults. For example, we saw increased expression of the fly fibroblast growth factor  
211 homolog, *branchless (bnl)*, the glycolytic enzyme, *Lactate dehydrogenase (Ldh/ImpL3)*, and the  
212 transcriptional repressor, *hairy (h)*, each of which has been shown to be upregulated upon hypoxia  
213 exposure (CENTANIN *et al.* 2008; ZHOU *et al.* 2008; LI *et al.* 2013) (Figure 1C). We previously showed  
214 hypoxia induces rapid nuclear localization and increased transcriptional activity of the transcription  
215 factor FOXO, which we found promoted hypoxia tolerance by increasing expression of the innate  
216 immune transcription factor Relish (*Rel*) (BARRETTO *et al.* 2020). Consistent with this, our transcriptome  
217 data showed that hypoxia led to increased expression of two FOXO target genes, *Thor* and *InR*, and  
218 increased expression of *Rel* and antimicrobial peptide genes (e.g., *CecA1*, *CecA2*, *AttB*, *AttA*, *Dro*),  
219 which are known targets of Relish (Figure 1C). Together these changes in gene expression confirm that  
220 our low oxygen exposure protocol induced a robust hypoxic response. Two previous studies used  
221 genome-wide transcriptome analyses to examine hypoxia regulated genes in *Drosophila* (LIU *et al.*  
222 2006a; LI *et al.* 2013). Like us, Liu *et al.* examined hypoxia in adult female flies, and they used DNA  
223 microarray hybridization to identify genes that showed significantly increased expression after 6 hours  
224 of severe (0.5% oxygen) hypoxia exposure. They identified 79 genes, of which 47 (59%) were also  
225 identified in our RNAseq analysis (significant overlap,  $p = 7.3 \times 10^{-29}$ ) (Supplemental Table 1). Li *et al.*  
226 also used DNA microarray hybridization to detect hypoxia-regulated genes, in this case, in late L3  
227 larvae using milder hypoxia (4% oxygen). They identified 627 significantly ( $p < 0.01$ ) upregulated (>1.5  
228 fold) genes, of which 130 (21%) were also identified as upregulated in our RNA-seq analysis (significant  
229 overlap,  $p = 2.2 \times 10^{-19}$ ), and they identified 417 significantly ( $p < 0.01$ ) downregulated (>1.5 fold) genes,  
230 of which 80 (19%) were also identified in our RNA-seq analysis (significant overlap,  $p = 4.8 \times 10^{-13}$ )  
231 (Supplemental Table 1). Thus, even though this study analyzed hypoxia at a different stage of the life

232 cycle and at a different concentration of oxygen, one-fifth of the genes that were identified as being  
233 hypoxia-regulated in larvae were also identified in our study in adults. The differences in the number of  
234 genes identified in our study versus the previous studies likely reflect differences in biology between  
235 larvae and adults, and the greater sensitivity of RNA-seq approaches to detect differentially expressed  
236 genes compared to DNA microarrays.

237

238 We used Gene Ontology analysis to examine the genes that showed upregulated expression upon  
239 hypoxia. This analysis showed that the upregulated genes were particularly enriched for gene  
240 categories related to chromatin modification and transcription, small G-protein regulators, and kinases  
241 (Figure 2A). In addition, KEGG pathway analysis of the upregulated genes showed enrichment for  
242 genes involved in Hippo, Notch, FOXO, and MAPK signaling (Figure 2B). We saw hypoxia-induced  
243 increases in gene expression for 132 regulators of transcription and chromatin, and 61 kinases (Figure  
244 2C). Together, these analyses suggest that hypoxia leads to widespread upregulation of different  
245 signaling pathways and transcriptional responses.

246

247 **FOXO is required for hypoxia-induced upregulation of signaling molecules and regulators of the Hippo**  
248 **pathway.**

249

250 To identify FOXO-dependent hypoxia-induced genes we identified genes that showed a significant (q-  
251 val <0.05), >1.5-fold upregulation upon hypoxia in *w<sup>1118</sup>* but not *foxo<sup>A94</sup>*. Using this criteria, we found that  
252 of the 1257 genes that were upregulated upon hypoxia exposure, 551 (44%) were not significantly  
253 upregulated in *foxo* mutants, suggesting that a large proportion of hypoxia-induced gene expression  
254 requires FOXO activity (Supplemental Table 1). Two previous studies used ChIP-chip and ChIP-seq  
255 approaches to identify FOXO genomic binding sites in young female adult flies, and, between them,  
256 identified 3925 loci that bound FOXO and were within 1kb of a protein coding gene (ALIC *et al.* 2011;  
257 BIRNBAUM *et al.* 2019). Interestingly, we saw that of the 553 FOXO-dependent hypoxia upregulated  
258 genes that we identified, 265 (48%) overlapped with these FOXO-bound genes (Figure 3A), suggesting  
259 that almost half the FOXO-dependent hypoxia genes may be induced by direct FOXO transcriptional  
260 activation (Supplemental Table 1). We used Gene Ontology analysis to examine the 553 FOXO-  
261 dependent hypoxia-upregulated genes. The main classes of genes identified were largely related to  
262 signaling regulators, such as kinases, GTPase regulators, and guanine-nucleotide exchange factors  
263 (Figure 3C). For example, we saw that many GTPase regulators required FOXO for their hypoxia  
264 upregulation and many of these contained FOXO binding sites within 1Kb of their gene coding region.  
265 In addition, almost half the kinases that we saw were induced in hypoxia were dependent on FOXO for  
266 their induction. Interestingly, among these signaling molecules, we saw enrichment in regulators of the



267 Hippo signaling pathway, many of which were previously shown to be enriched among FOXO-bound  
268 genes, suggesting that they may be directly regulated by FOXO (Figure 3D).

269  
270 **Hipk is upregulated in hypoxia and modulates hypoxia tolerance.**

271  
272 One regulator of the Hippo pathway we saw upregulated and associated with a FOXO DNA binding site  
273 was Homeodomain interacting protein kinase (Hipk). In *Drosophila*, Hipk has been shown to control  
274 metabolism and growth in epithelial tissues, and has been shown to function as a regulator of several  
275 signaling pathways including Hippo, Wingless, Notch, JAK/STAT and JNK (LEE *et al.* 2009a; LEE *et al.*  
276 2009b; CHEN AND VERHEYEN 2012; POON *et al.* 2012; VERHEYEN *et al.* 2012; BLAQUIERE *et al.* 2014;  
277 TETTWEILER *et al.* 2019; WONG *et al.* 2019; KINSEY *et al.* 2021; STEINMETZ *et al.* 2021). In addition, a  
278 recent study in *C. elegans* showed that the worm homolog of Hipk, *hpk1*, was a regulator of worm  
279 survival in low oxygen (DOERING *et al.* 2022). We therefore examined the role of Hipk in *Drosophila*  
280 hypoxia in more detail. Using qRT-PCR we confirmed that hypoxia exposure led to an increase in *hipk*  
281 mRNA levels in whole animals. We also saw hypoxia-induced increases in *hipk* mRNA levels in specific  
282 tissues such as the head, thorax (which is enriched in muscle), ovaries, and abdomen (which is  
283 enriched in adipose tissues), suggesting that the hypoxia-mediated increase in Hipk expression  
284 occurred across many tissues (Figure 3E). To explore the functional role for Hipk in hypoxia, we used  
285 the RNAi to knockdown *hipk* in flies and examined the effects on hypoxia tolerance. We used the  
286 *daughterless-GeneSwitch-Gal4 (da-GSG)* driver to induce ubiquitous expression of the dsRNA and to  
287 restrict RNAi-mediated knockdown of *hipk* to adult stages. We fed *da-GSG>hipk RNAi* females either  
288 normal food (control) or RU486-containing food to induce RNAi (*hipk RNAi*) and then examined the  
289 effects on hypoxia survival. We found that following 20 hours of hypoxia exposure the *hipk RNAi*  
290 animals had significantly reduced hypoxia survival compared to the control flies, suggesting that Hipk is  
291 required for hypoxia tolerance (Figure 3F).

292  
293 **Hypoxia downregulates expression of protein synthesis and egg production genes and leads to reduced**  
294 **translation and fecundity.**

295  
296 We used Gene Ontology analysis to examine the genes that showed significantly reduced (>1.5 fold  
297 decrease) expression upon hypoxia in control *w<sup>1118</sup>* animals. We saw enrichment in genes involved in  
298 ribosome function, egg formation, and proteolysis (Figure 4A, B). Almost all the proteolysis genes were  
299 proteases that showed enriched expression in either the intestine or fat body (Supplemental Table 1).  
300 The decreased expression of genes involved in ribosome function is consistent with suppressed protein  
301 synthesis, a widely seen response to hypoxia in different organisms. We previously showed that  
302 regulation of tRNA synthesis was a key mechanism for regulating protein synthesis in *Drosophila*,

303 particularly in response to nutrient starvation (MARSHALL *et al.* 2012; RIDEOUT *et al.* 2012;  
304 SRISKANTHADEVAN-PIRAHAS *et al.* 2018). When we examined tRNA levels by qPCR, we saw a strong  
305 reduction following hypoxia exposure (1% oxygen) in adults (Figure 4C). Furthermore, we saw that  
306 exposure of larvae to 1% oxygen also led to a strong reduction in tRNA levels that was observed at both  
307 2 and 24 hours of hypoxia exposure (Figure 4D, E). We also saw that hypoxia larvae showed a similarly  
308 rapid decrease in overall translation compared to normoxic animals as shown by a decrease in  
309 polysome:monosome ratios in polysome profiles from whole animal lysates (Figure 4F). These results  
310 indicate that global suppression of protein synthesis is a common response to extreme hypoxia in both  
311 larvae and adults.

312

313 Given the decreased expression of egg formation genes, we also examined whether hypoxia might  
314 impact female fecundity. To do this, we exposed mated *w<sup>1118</sup>* females to hypoxia for either 8 or 12  
315 hours, allowed them to recover for a day, and then measured how many viable progeny they produced  
316 in the subsequent two days. We saw that when exposed to either 8 or 12 hours of hypoxia, females  
317 produced significantly fewer viable progeny compared to normoxic control females (Figure 4G). These  
318 results indicate that a brief exposure to hypoxia can suppress fecundity in female flies.

319

320 **FOXO is needed for hypoxia-mediated decreases in ribosome and mitochondrial gene expression.**

321

322 We then examined which downregulated genes were dependent on FOXO, by identifying genes that  
323 were significantly downregulated (<1.3 fold) in *w<sup>1118</sup>* flies but not *foxo* mutants. We chose a lower fold  
324 change value because the significantly downregulated genes tended to be less affected than the  
325 upregulated genes. From this analysis, we identified 529 genes (39% of 1343 total downregulated  
326 genes) (Supplemental Table 1). Of these, 87 were previously shown to be bound to FOXO (ALIC *et al.*  
327 2011; BIRNBAUM *et al.* 2019), suggesting that FOXO-mediated decreases in gene expression in hypoxia  
328 are largely indirect (Figure 5A) (Supplemental Table 1). We used GO analysis to examine the functional  
329 categories of FOXO-dependent downregulated genes and identified strong enrichment in two main  
330 classes - ribosomal proteins and mitochondrial regulators (Figure 5B). We saw that genes coding for  
331 ribosomal proteins for both the small and large subunits showed reduced expression in *w<sup>1118</sup>* but not  
332 *foxo* mutant animals (Figure 5C). We also found that many mitochondrial genes required FOXO for their  
333 downregulation in hypoxia, including known or predicted mitochondrial ribosome proteins, cytochrome-  
334 C oxidase subunits, complex I subunits, ATP synthases subunits, and mitochondrial transporters  
335 (Figure 5C). These results suggest that an important role for FOXO in hypoxia is to suppress both  
336 mitochondrial and protein synthetic activity.

337

338 **Discussion**

339

340 We previously showed that the FOXO transcription factor was required for hypoxia tolerance  
341 (BARRETTO *et al.* 2020). One focus of this current study was to identify which genes might be FOXO-  
342 regulated in hypoxia. Our results indicate that hypoxia exposure alters (+/- 1.5 fold or greater) the  
343 transcript levels of ~2300 genes in our control (*w<sup>1118</sup>*) line, indicating a widespread modification of gene  
344 expression. To identify which gene expression changes are FOXO dependent, we chose to identify  
345 which genes had significantly altered expression in *w<sup>1118</sup>* but not *foxo* mutants. This analysis showed  
346 that approximately 40% of hypoxia regulated genes required FOXO. Furthermore, using data from  
347 previous genome wide FOXO ChIP studies (ALIC *et al.* 2011; BIRNBAUM *et al.* 2019) we saw that  
348 approximately half the FOXO dependent upregulated genes were directly bound by FOXO. These  
349 results suggest that FOXO is needed for widespread transcriptional changes upon hypoxia. A previous  
350 report examining genome-wide changes in gene expression upon hypoxia exposure in larvae showed  
351 that HIF-1 alpha was required for just under half of the changes in gene expression, and that the  
352 transcription factor estrogen-related receptor (ERR) was also important for mediating many of the  
353 effects of hypoxia on gene expression (LI *et al.* 2013). This study and our findings suggest that HIF-1  
354 alpha, ERR, and FOXO may mediate many of the widespread changes in gene expression when flies  
355 are in low oxygen conditions. For example, we previously showed that FOXO was required for hypoxia  
356 tolerance in larvae (BARRETTO *et al.* 2020), suggesting it may cooperate or work in parallel with HIF-1  
357 alpha and/or ERR to regulate hypoxia-mediated changes in gene expression at this developmental  
358 stage. Interestingly, we also saw that ERR mRNA levels were significantly increased upon hypoxia in  
359 adults (1.48-fold), although this was below our cut-off of 1.5-fold. Nevertheless, this suggests that ERR  
360 may also be important for hypoxia-mediated gene expression changes in the adult.

361

362 Hypoxia-upregulated genes were enriched for kinases, regulators of small GTPases, and regulators of  
363 gene expression such as transcription factors and chromatin modifiers. This suggests that a major  
364 response to hypoxia is widespread alterations in cell-cell signaling pathways and their downstream  
365 transcriptional effectors. We found that upregulation of many of these signaling genes was dependent  
366 on FOXO and likely direct, since many of these bound FOXO. Interestingly, regulators of the Hippo  
367 pathway were among the FOXO dependent upregulated genes. The Hippo pathway has been best  
368 studied in the context of cell growth and proliferation especially in epithelial, neural, and stem cells (MA  
369 *et al.* 2019; WU AND GUAN 2021). In these cells, the pathway often functions to couple cell-to-cell  
370 adhesion and cell polarity cues to the regulation of the downstream transcription factor Yorkie. Among  
371 the hypoxia-upregulated genes were several cell polarity/cell adhesion factors (*Ed*, *dlg1*, *sdt*, *baz*) and  
372 signaling molecules (*hpo*, *mats*, *pez*, *mts*) that function to negatively regulate Yorkie, suggesting that  
373 this may be an important regulator of hypoxia-mediated transcriptional responses. This regulation of  
374 Yorkie-mediated transcription may be important for regulation of stem or germ cell division upon

375 hypoxia in adult flies. Yorkie can also regulate the processes of tracheal formation and immune  
376 signaling, which are both important in hypoxia. Recent studies have also shown that the mammalian  
377 homolog of Yorkie, Yap1, controls hypoxia-mediated angiogenesis in bone, suggesting that regulation  
378 of Hippo/Yorkie signaling may be a conserved hypoxia response (SIVARAJ *et al.* 2020).

379

380 One kinase that showed FOXO-dependent increase in hypoxia was Hipk. We saw that this increase  
381 occurred across multiple tissues and was required for flies to survive hypoxia. These results point to  
382 Hipk as a regulator of hypoxia tolerance. As well as regulating Hippo/Yorkie signaling, Hipk can  
383 modulate other signaling pathways such as JNK, JAK/STAT, Wingless signaling(LEE *et al.* 2009b;  
384 HUANG *et al.* 2011; CHEN AND VERHEYEN 2012; POON *et al.* 2012; VERHEYEN *et al.* 2012; BLAQUIERE *et*  
385 *al.* 2014; TETTWEILER *et al.* 2019; KINSEY *et al.* 2021; STEINMETZ *et al.* 2021), as well as Notch signaling  
386 (LEE *et al.* 2009a), a pathway that we saw enriched in the KEGG analysis of hypoxia-upregulated  
387 genes. Thus, Hipk's role in hypoxia tolerance may rely on regulation of any one of these pathways. Hipk  
388 has also been shown to induce glycolysis in larval epithelial tissues where it promotes tumor-like  
389 overgrowth (WONG *et al.* 2019). Hence, the hypoxia-mediated induction of Hipk may also be needed to  
390 induce glycolysis, a widely described metabolic response to low oxygen. Interestingly, a recent report  
391 showed that the *C. elegans* homolog of Hipk, hpk1, was needed for survival in low oxygen (DOERING *et*  
392 *al.* 2022), suggesting a common role for Hipk in organismal hypoxia tolerance in both worms and flies.

393

394 Among the genes showing reduced expression in hypoxia, we saw strong enrichments for genes  
395 involved in egg production and translation. Furthermore, we saw that hypoxia suppressed female  
396 fecundity, and reduced translation and tRNA synthesis in both larvae and adults. Egg production is an  
397 energetically costly process, and therefore may be suppressed to ensure appropriate allocation of  
398 energetic resources to promote survival during stress. This type of trade-off between fecundity and  
399 stress responses has been seen in *Drosophila* in response to other environmental challenges. For  
400 example, upon infection with bacteria, fungi or viruses, flies have been shown to reduce their  
401 reproductive output and capacity (SCHWENKE *et al.* 2016). Moreover, germline deficient females that  
402 cannot produce eggs have enhanced immunity compared to fertile flies (SHORT *et al.* 2012). Similarly,  
403 nutrient starvation leads to reduced germline stem cell division and reduced egg production in females  
404 (DRUMMOND-BARBOSA AND SPRADLING 2001; LAFEVER *et al.* 2010; ABLES *et al.* 2012).

405

406 Protein synthesis is also an energetically costly process that has been estimated to account for at least  
407 one-third of a cell's ATP use (BUTTGEREIT AND BRAND 1995). Hence, it is not surprising that suppression  
408 of protein synthesis is a conserved response to hypoxia that is seen in many animals and that can  
409 promote hypoxia tolerance (HOFMANN AND HAND 1994; HOCHACHKA *et al.* 1996; LIU *et al.* 2006b; VAN  
410 DEN BEUCKEN *et al.* 2006; ANDERSON *et al.* 2009; SCOTT *et al.* 2013). Our transcriptomic analyses

411 suggest that one way that hypoxia suppresses protein synthesis is by reducing expression of ribosome  
412 protein genes via FOXO. We also saw that FOXO was required for hypoxia-mediated suppression of  
413 many mitochondrial genes, including mitochondrial ribosomal proteins, mitochondrial transporters, and  
414 regulators of oxidative phosphorylation, such as subunits of ATP synthase, Cytochrome oxidase C, and  
415 Complex I. These results suggest that FOXO may also contribute to hypoxia tolerance by limiting  
416 energetically costly metabolic processes. FOXO suppression of ribosome protein and mitochondrial  
417 genes has also been seen in muscle following nutrient starvation in *Drosophila* larvae (TELEMAN *et al.*  
418 2008). Furthermore, a recent study showed that the FOXO homolog in *C. elegans*, daf-16, promotes a  
419 hypoxia tolerant phenotype by suppressing ribosomal protein gene expression and partially  
420 suppressing genes involved in oxidative phosphorylation (HEMPHILL *et al.* 2022). Hence, reducing both  
421 ribosome gene expression and mitochondrial oxidative phosphorylation may be common FOXO-  
422 mediated stress responses.

423

424 In conclusion, our transcriptome analysis supports a model in which FOXO promotes hypoxia tolerance  
425 through controlling the upregulation of cell signaling pathways while suppressing the energetically  
426 costly processes of protein synthesis and mitochondrial activity. Given the conserved roles for FOXO in  
427 mediating hypoxia tolerance in different animals (SCOTT *et al.* 2002; MENDENHALL *et al.* 2006; MENUZ *et*  
428 *al.* 2009; LIU *et al.* 2016; BARRETTO *et al.* 2020; HEMPILL *et al.* 2022) and the alterations of FOXO  
429 transcription factor activity in diseases associated with hypoxia, such as cancer, stroke, and ischemia  
430 (MAIESE *et al.* 2008; FUKUNAGA AND SHIODA 2009; MAIESE *et al.* 2009; LIU *et al.* 2022), our findings  
431 highlight processes that may contribute to low oxygen adaptations in both normal and disease states.

432

### 433 **Data availability**

434 The RNA-sequence data has been deposited in NCBI's Gene Expression Omnibus and are accessible  
435 through GEO Series accession number: GSE206206

436 (<https://www.ncbi.nlm.nih.gov/geo/query/acc.cgi?acc=GSE206206>)

437

### 438 **Acknowledgements**

439 Stocks obtained from the Bloomington *Drosophila* Stock Center (NIH P40OD018537) were used in this  
440 study.

441

### 442 **Funding**

443 This work was supported by CIHR Project Grants (PJT-173517, PJT-152892) and an NSERC discovery  
444 grant to S.S.G, an Alberta Innovates Graduate Studentship to E.C.B., a CIHR Fellowship to M.J., and

445 an NSERC Discovery grant, an Azrieli Future Leader In Canadian Brain Science (Brain Canada/Azrieli  
446 Foundation), CIHR Project Grants (PJT-173475, PJT-156278) and a Canada Research Chair to M.G.

447

## 448 **Conflict of interests**

449 The authors declare no competing interests.

450

## 451 **Author contributions.**

452 K.D., E.C.B and B.L, carried out genetic and molecular experiments in *Drosophila*. M.J. performed  
453 bioinformatic analyses. K.D., E.C.B, B.L, and S.S.G. analyzed the data. M.G. and S.S.G. obtained  
454 funding. S.S.G. directed the study and wrote the manuscript. All authors helped edit the final  
455 manuscript.

456

## 457 **Figure Legends**

458

459 **Figure 1. Hypoxia-induced alterations in whole-body gene expression.** A) Schematic outline of our  
460 experimental approach. B) Volcano plot showing the up- (orange) and down-regulated (blue) genes  
461 following hypoxia exposure. Genes were considered differentially expressed if they showed a significant  
462 (q-val (FDR corrected p-val) <0.05) change in expression that was > +/- 1.5-fold different in hypoxia vs  
463 normoxia. Dashed line indicates q-val = 0.05. C) Heatmap depicting the change in expression (Log2  
464 fold change, hypoxia vs normoxia conditions) of previously described hypoxia-induced genes.

465

466 **Figure 2. Hypoxia upregulates mRNA expression of transcription factors and kinase genes.** A) GO  
467 analysis (molecular function category), and B) KEGG pathway analysis of genes showing >1.5-fold  
468 increase following hypoxia exposure. C) Heatmap depicting the increases in mRNA expression (Log2  
469 fold change hypoxia vs normoxia) of transcription factor genes. D) Heatmap depicting the increases in  
470 mRNA expression (Log2 fold change hypoxia vs normoxia) of kinase genes.

471

472 **Figure 3. Hipk is a hypoxia-induced gene required for organismal hypoxia tolerance.** A) Venn diagram  
473 showing overlap between genes previously shown to have FOXO binding within 1kb, as detected by  
474 ChIP, and FOXO-dependent upregulated genes identified in the present study. B) GO analysis  
475 (molecular function category) of FOXO-dependent hypoxia induced genes (genes showing a significant  
476 >1.5-fold increase in mRNA expression following hypoxia exposure in *w<sup>1118</sup>* but not *foxo* mutants). C)  
477 Heatmap depicting the increases in mRNA expression (Log2 fold change, hypoxia vs normoxia) of  
478 GTPase regulators and kinases in *w<sup>1118</sup>* and *foxo* mutants. Blue squares indicate genes previously  
479 shown to have FOXO binding within 1kb of the gene as measured by ChIP. D) Heatmap depicting the



480 increases in mRNA expression (Log2 fold change, hypoxia vs normoxia) of Hippo pathway genes in  
481 *w<sup>1118</sup>* and *foxo* mutants. Blue squares indicate genes previously shown to have FOXO binding within  
482 1kb of the gene as measured by CHIP. E) qPCR analysis of *hipk* mRNA levels from normoxia vs  
483 hypoxia exposed animals. RNA was isolated from either whole animals or specific tissues. Bars  
484 represent mean +/- SEM. Symbols represent individual data points, n=4 per condition. \* p<0.05,  
485 Students t-test. F) Hypoxia survival of control (*daGSG > hipk RNAi*, no RU486) vs *hipk RNAi (daGSG >*  
486 *Hipk RNAi*, RU486-treated) adult flies. Data are presented as box plots (25%, median and 75% values)  
487 with error bars indicating the min and max values, n = 14 groups of flies per condition.

488

489 **Figure 4. Hypoxia downregulates mRNA expression of protein synthesis and egg formation genes and**  
490 **leads to reduced translation and decreased fecundity.** A, B) GO analysis (A, biological process category  
491 and B, cellular component category) of genes showing >1.5-fold decrease in expression following  
492 hypoxia exposure. C, D) qRT-PCR measurement of tRNA levels following C, 2hrs or D, 24hrs of  
493 hypoxia exposure in developing larvae. Bars represent mean +/- SEM. Symbols represent individual  
494 data points, n=4 per condition. \* p<0.05, Students t-test. F) Polysome profiles of normoxia (left) and  
495 hypoxia (right) exposed larvae. Plots indicate continuous OD 254nm measurements from fractionated  
496 whole-body lysates. Peaks corresponding to 40S, 60S, 80S and polysomes are indicated. The top and  
497 bottom lysate fractions from the centrifuged sucrose gradients are indicated. G) Fecundity  
498 measurements from mated females exposed to normoxia or 8 or 12 hrs of hypoxia. Data show the  
499 mean number of viable pupae per female that developed from eggs laid on day 1 or day 2 following the  
500 hypoxia exposure. Bars represent mean +/- SEM. Symbols represent individual data points, n=4 per  
501 condition. \* p<0.05, Students t-test following two-way ANOVA.

502

503 **Figure 5. Hypoxia downregulation of ribosomal protein and mitochondrial regulator gene expression**  
504 **requires FOXO.** A) GO analysis (cell component category) of FOXO-dependent hypoxia suppressed  
505 genes (genes showing a significant decrease in mRNA expression following hypoxia exposure in *w<sup>1118</sup>*  
506 but not *foxo* mutants). B) Heatmap depicting the decreases in mRNA expression (Log2 fold change,  
507 hypoxia vs normoxia) of ribosomal protein genes and mitochondrial regulator genes in *w<sup>1118</sup>* and *foxo*  
508 mutants. Colored circles indicate different classes of mitochondrial genes (blue: ATP synthase subunits;  
509 orange: mitochondrial ribosomal proteins; green: Cytochrome C oxidase subunits; grey: Complex I  
510 subunits; black: mitochondrial transporters).

511

## 512 Supplemental Table 1

513 Processed RNA-seq data, including lists of up- and down-regulated genes.

514

## 515 References

516

- 517 Ables, E. T., K. M. Laws and D. Drummond-Barbosa, 2012 Control of adult stem cells in vivo by a  
518 dynamic physiological environment: diet-dependent systemic factors in *Drosophila* and beyond.  
519 Wiley Interdiscip Rev Dev Biol 1: 657-674.
- 520 Alic, N., T. D. Andrews, M. E. Giannakou, I. Papatheodorou, C. Slack *et al.*, 2011 Genome-wide dFOXO  
521 targets and topology of the transcriptomic response to stress and insulin signalling. Mol Syst Biol  
522 7: 502.
- 523 Alic, N., M. E. Giannakou, I. Papatheodorou, M. P. Hoddinott, T. D. Andrews *et al.*, 2014a Interplay of  
524 dFOXO and two ETS-family transcription factors determines lifespan in *Drosophila*  
525 melanogaster. PLoS Genet 10: e1004619.
- 526 Alic, N., J. M. Tullet, T. Niccoli, S. Broughton, M. P. Hoddinott *et al.*, 2014b Cell-nonautonomous effects  
527 of dFOXO/DAF-16 in aging. Cell Rep 6: 608-616.
- 528 Anderson, L. L., X. Mao, B. A. Scott and C. M. Crowder, 2009 Survival from hypoxia in *C. elegans* by  
529 inactivation of aminoacyl-tRNA synthetases. Science 323: 630-633.
- 530 Bandarra, D., J. Biddlestone, S. Mudie, H. A. Muller and S. Rocha, 2014 Hypoxia activates IKK-NF-  
531 kappaB and the immune response in *Drosophila melanogaster*. Biosci Rep 34.
- 532 Barretto, E. C., D. M. Polan, A. N. Beevor-Potts, B. Lee and S. S. Grewal, 2020 Tolerance to Hypoxia Is  
533 Promoted by FOXO Regulation of the Innate Immunity Transcription Factor NF-kappaB/Relish in  
534 *Drosophila*. Genetics.
- 535 Bickler, P. E., and L. T. Buck, 2007 Hypoxia tolerance in reptiles, amphibians, and fishes: life with  
536 variable oxygen availability. Annu Rev Physiol 69: 145-170.
- 537 Birnbaum, A., X. Wu, M. Tatar, N. Liu and H. Bai, 2019 Age-Dependent Changes in Transcription  
538 Factor FOXO Targeting in Female *Drosophila*. Front Genet 10: 312.
- 539 Blaquiere, J. A., W. Lee and E. M. Verheyen, 2014 Hipk promotes photoreceptor differentiation through  
540 the repression of Twin of eyeless and Eyeless expression. Dev Biol 390: 14-25.
- 541 Borch Jensen, M., Y. Qi, R. Riley, L. Rabkina and H. Jasper, 2017 PGAM5 promotes lasting FoxO  
542 activation after developmental mitochondrial stress and extends lifespan in *Drosophila*. Elife 6.
- 543 Bray, N. L., H. Pimentel, P. Melsted and L. Pachter, 2016 Near-optimal probabilistic RNA-seq  
544 quantification. Nat Biotechnol 34: 525-527.
- 545 Buttgerit, F., and M. D. Brand, 1995 A hierarchy of ATP-consuming processes in mammalian cells.  
546 Biochem J 312 ( Pt 1): 163-167.

- 547 Callier, V., S. C. Hand, J. B. Campbell, T. Biddulph and J. F. Harrison, 2015 Developmental changes in  
548 hypoxic exposure and responses to anoxia in *Drosophila melanogaster*. *J Exp Biol* 218: 2927-  
549 2934.
- 550 Centanin, L., A. Dekanty, N. Romero, M. Irisarri, T. A. Gorr *et al.*, 2008 Cell autonomy of HIF effects in  
551 *Drosophila*: tracheal cells sense hypoxia and induce terminal branch sprouting. *Dev Cell* 14:  
552 547-558.
- 553 Centanin, L., P. J. Ratcliffe and P. Wappner, 2005 Reversion of lethality and growth defects in Fatiga  
554 oxygen-sensor mutant flies by loss of hypoxia-inducible factor- $\alpha$ /Sima. *EMBO Rep* 6: 1070-  
555 1075.
- 556 Chen, J., and E. M. Verheyen, 2012 Homeodomain-interacting protein kinase regulates Yorkie activity  
557 to promote tissue growth. *Curr Biol* 22: 1582-1586.
- 558 Clegg, J., 1997 Embryos of *Artemia franciscana* survive four years of continuous anoxia: the case for  
559 complete metabolic rate depression. *J Exp Biol* 200: 467-475.
- 560 Danovaro, R., A. Dell'Anno, A. Pusceddu, C. Gambi, I. Heiner *et al.*, 2010 The first metazoa living in  
561 permanently anoxic conditions. *BMC Biol* 8: 30.
- 562 Demontis, F., and N. Perrimon, 2010 FOXO/4E-BP signaling in *Drosophila* muscles regulates  
563 organism-wide proteostasis during aging. *Cell* 143: 813-825.
- 564 Dionne, M. S., L. N. Pham, M. Shirasu-Hiza and D. S. Schneider, 2006 Akt and FOXO dysregulation  
565 contribute to infection-induced wasting in *Drosophila*. *Curr Biol* 16: 1977-1985.
- 566 Dobson, A. J., M. Ezcurra, C. E. Flanagan, A. C. Summerfield, M. D. W. Piper *et al.*, 2017 Nutritional  
567 Programming of Lifespan by FOXO Inhibition on Sugar-Rich Diets. *Cell Rep* 18: 299-306.
- 568 Doering, K. R. S., X. Cheng, L. Milburn, R. Ratnappan, A. Ghazi *et al.*, 2022 Nuclear hormone receptor  
569 NHR-49 acts in parallel with HIF-1 to promote hypoxia adaptation in *Caenorhabditis elegans*.  
570 *Elife* 11.
- 571 Drummond-Barbosa, D., and A. C. Spradling, 2001 Stem cells and their progeny respond to nutritional  
572 changes during *Drosophila* oogenesis. *Dev Biol* 231: 265-278.
- 573 Foe, V. E., and B. M. Alberts, 1985 Reversible chromosome condensation induced in *Drosophila*  
574 embryos by anoxia: visualization of interphase nuclear organization. *J Cell Biol* 100: 1623-1636.
- 575 Fukunaga, K., and N. Shioda, 2009 Pathophysiological relevance of forkhead transcription factors in  
576 brain ischemia. *Adv Exp Med Biol* 665: 130-142.
- 577 Giannakou, M. E., M. Goss, M. A. Junger, E. Hafen, S. J. Leivers *et al.*, 2004 Long-lived *Drosophila*  
578 with overexpressed dFOXO in adult fat body. *Science* 305: 361.

- 579 Harrison, J. F., K. J. Greenlee and W. Verberk, 2018 Functional Hypoxia in Insects: Definition,  
580 Assessment, and Consequences for Physiology, Ecology, and Evolution. *Annu Rev Entomol* 63:  
581 303-325.
- 582 Harrison, J. F., and G. G. Haddad, 2011 Effects of oxygen on growth and size: synthesis of molecular,  
583 organismal, and evolutionary studies with *Drosophila melanogaster*. *Annu Rev Physiol* 73: 95-  
584 113.
- 585 Hemphill, C., E. Pylarinou-Sinclair, O. Itani, B. Scott, C. M. Crowder *et al.*, 2022 Daf-16 mediated  
586 repression of cytosolic ribosomal protein genes facilitates a hypoxia sensitive to hypoxia  
587 resistant transformation in long-lived germline mutants. *PLoS Genet* 18: e1009672.
- 588 Hochachka, P. W., L. T. Buck, C. J. Doll and S. C. Land, 1996 Unifying theory of hypoxia tolerance:  
589 molecular/metabolic defense and rescue mechanisms for surviving oxygen lack. *Proc Natl Acad*  
590 *Sci U S A* 93: 9493-9498.
- 591 Hofmann, G. E., and S. C. Hand, 1994 Global arrest of translation during invertebrate quiescence. *Proc*  
592 *Natl Acad Sci U S A* 91: 8492-8496.
- 593 Holdsworth, M. J., and D. J. Gibbs, 2020 Comparative Biology of Oxygen Sensing in Plants and  
594 Animals. *Curr Biol* 30: R362-R369.
- 595 Huang, H., G. Du, H. Chen, X. Liang, C. Li *et al.*, 2011 *Drosophila* Smt3 negatively regulates JNK  
596 signaling through sequestering Hipk in the nucleus. *Development* 138: 2477-2485.
- 597 Hwangbo, D. S., B. Gersham, M. P. Tu, M. Palmer and M. Tatar, 2004 *Drosophila* dFOXO controls  
598 lifespan and regulates insulin signalling in brain and fat body. *Nature* 429: 562-566.
- 599 Junger, M. A., F. Rintelen, H. Stocker, J. D. Wasserman, M. Vegh *et al.*, 2003 The *Drosophila* forkhead  
600 transcription factor FOXO mediates the reduction in cell number associated with reduced insulin  
601 signaling. *J Biol* 2: 20.
- 602 Karpac, J., J. Hull-Thompson, M. Falleur and H. Jasper, 2009 JNK signaling in insulin-producing cells is  
603 required for adaptive responses to stress in *Drosophila*. *Aging Cell* 8: 288-295.
- 604 Karpac, J., A. Younger and H. Jasper, 2011 Dynamic coordination of innate immune signaling and  
605 insulin signaling regulates systemic responses to localized DNA damage. *Dev Cell* 20: 841-854.
- 606 Kinsey, S. D., J. P. Vinluan, G. A. Shipman and E. M. Verheyen, 2021 Expression of human HIPKs in  
607 *Drosophila* demonstrates their shared and unique functions in a developmental model. *G3*  
608 (Bethesda) 11.
- 609 Kramer, J. M., J. D. Slade and B. E. Staveley, 2008 foxo is required for resistance to amino acid  
610 starvation in *Drosophila*. *Genome* 51: 668-672.

- 611 LaFever, L., A. Feoktistov, H. J. Hsu and D. Drummond-Barbosa, 2010 Specific roles of Target of  
612 rapamycin in the control of stem cells and their progeny in the *Drosophila* ovary. *Development*  
613 137: 2117-2126.
- 614 Lavista-Llanos, S., L. Centanin, M. Irisarri, D. M. Russo, J. M. Gleadle *et al.*, 2002 Control of the  
615 hypoxic response in *Drosophila melanogaster* by the basic helix-loop-helix PAS protein similar.  
616 *Mol Cell Biol* 22: 6842-6853.
- 617 Lee, B., E. C. Barretto and S. S. Grewal, 2019 TORC1 modulation in adipose tissue is required for  
618 organismal adaptation to hypoxia in *Drosophila*. *Nat Commun* 10: 1878.
- 619 Lee, W., B. C. Andrews, M. Faust, U. Walldorf and E. M. Verheyen, 2009a Hipk is an essential protein  
620 that promotes Notch signal transduction in the *Drosophila* eye by inhibition of the global co-  
621 repressor Groucho. *Dev Biol* 325: 263-272.
- 622 Lee, W., S. Swarup, J. Chen, T. Ishitani and E. M. Verheyen, 2009b Homeodomain-interacting protein  
623 kinases (Hipks) promote Wnt/Wg signaling through stabilization of beta-catenin/Arm and  
624 stimulation of target gene expression. *Development* 136: 241-251.
- 625 Li, Y., D. Padmanabha, L. B. Gentile, C. I. Dumur, R. B. Beckstead *et al.*, 2013 HIF- and non-HIF-  
626 regulated hypoxic responses require the estrogen-related receptor in *Drosophila melanogaster*.  
627 *PLoS Genet* 9: e1003230.
- 628 Liu, G., J. Roy and E. A. Johnson, 2006a Identification and function of hypoxia-response genes in  
629 *Drosophila melanogaster*. *Physiol Genomics* 25: 134-141.
- 630 Liu, L., T. P. Cash, R. G. Jones, B. Keith, C. B. Thompson *et al.*, 2006b Hypoxia-induced energy stress  
631 regulates mRNA translation and cell growth. *Mol Cell* 21: 521-531.
- 632 Liu, X., X. Cai, B. Hu, Z. Mei, D. Zhang *et al.*, 2016 Forkhead Transcription Factor 3a (FOXO3a)  
633 Modulates Hypoxia Signaling via Up-regulation of the von Hippel-Lindau Gene (VHL). *J Biol*  
634 *Chem* 291: 25692-25705.
- 635 Liu, Y., Y. Wang, X. Li, Y. Jia, J. Wang *et al.*, 2022 FOXO3a in cancer drug resistance. *Cancer Lett* 540:  
636 215724.
- 637 Ma, S., Z. Meng, R. Chen and K. L. Guan, 2019 The Hippo Pathway: Biology and Pathophysiology.  
638 *Annu Rev Biochem* 88: 577-604.
- 639 Maiese, K., Z. Z. Chong, Y. C. Shang and J. Hou, 2008 Clever cancer strategies with FoxO transcription  
640 factors. *Cell Cycle* 7: 3829-3839.
- 641 Maiese, K., Z. Z. Chong, Y. C. Shang and J. Hou, 2009 FoxO proteins: cunning concepts and  
642 considerations for the cardiovascular system. *Clin Sci (Lond)* 116: 191-203.

- 643 Markow, T. A., 2015 The secret lives of *Drosophila* flies. *Elife* 4.
- 644 Marshall, L., E. J. Rideout and S. S. Grewal, 2012 Nutrient/TOR-dependent regulation of RNA  
645 polymerase III controls tissue and organismal growth in *Drosophila*. *EMBO J* 31: 1916-1930.
- 646 Mendenhall, A. R., B. LaRue and P. A. Padilla, 2006 Glyceraldehyde-3-phosphate dehydrogenase  
647 mediates anoxia response and survival in *Caenorhabditis elegans*. *Genetics* 174: 1173-1187.
- 648 Menuz, V., K. S. Howell, S. Gentina, S. Epstein, I. Riezman *et al.*, 2009 Protection of *C. elegans* from  
649 anoxia by HYL-2 ceramide synthase. *Science* 324: 381-384.
- 650 Morton, D. B., 2011 Behavioral responses to hypoxia and hyperoxia in *Drosophila* larvae: molecular and  
651 neuronal sensors. *Fly (Austin)* 5: 119-125.
- 652 Nakazawa, M. S., B. Keith and M. C. Simon, 2016 Oxygen availability and metabolic adaptations. *Nat*  
653 *Rev Cancer* 16: 663-673.
- 654 Padilla, P. A., and M. L. Ladage, 2012 Suspended animation, diapause and quiescence: arresting the  
655 cell cycle in *C. elegans*. *Cell Cycle* 11: 1672-1679.
- 656 Park, T. J., J. Reznick, B. L. Peterson, G. Blass, D. Omerbasic *et al.*, 2017 Fructose-driven glycolysis  
657 supports anoxia resistance in the naked mole-rat. *Science* 356: 307-311.
- 658 Pimentel, H., N. L. Bray, S. Puente, P. Melsted and L. Pachter, 2017 Differential analysis of RNA-seq  
659 incorporating quantification uncertainty. *Nat Methods* 14: 687-690.
- 660 Poon, C. L., X. Zhang, J. I. Lin, S. A. Manning and K. F. Harvey, 2012 Homeodomain-interacting protein  
661 kinase regulates Hippo pathway-dependent tissue growth. *Curr Biol* 22: 1587-1594.
- 662 Ramirez, J. M., L. P. Folkow and A. S. Blix, 2007 Hypoxia tolerance in mammals and birds: from the  
663 wilderness to the clinic. *Annu Rev Physiol* 69: 113-143.
- 664 Raudvere, U., L. Kolberg, I. Kuzmin, T. Arak, P. Adler *et al.*, 2019 g:Profiler: a web server for functional  
665 enrichment analysis and conversions of gene lists (2019 update). *Nucleic Acids Res* 47: W191-  
666 W198.
- 667 Rideout, E. J., L. Marshall and S. S. Grewal, 2012 *Drosophila* RNA polymerase III repressor Maf1  
668 controls body size and developmental timing by modulating tRNA<sup>iMet</sup> synthesis and systemic  
669 insulin signaling. *Proc Natl Acad Sci U S A* 109: 1139-1144.
- 670 Romero, N. M., A. Dekanty and P. Wappner, 2007 Cellular and developmental adaptations to hypoxia:  
671 a *Drosophila* perspective. *Methods Enzymol* 435: 123-144.
- 672 Samanta, D., N. R. Prabhakar and G. L. Semenza, 2017 Systems biology of oxygen homeostasis.  
673 *Wiley Interdiscip Rev Syst Biol Med* 9.



- 674 Schito, L., and S. Rey, 2018 Cell-Autonomous Metabolic Reprogramming in Hypoxia. *Trends Cell Biol*  
675 28: 128-142.
- 676 Schwenke, R. A., B. P. Lazzaro and M. F. Wolfner, 2016 Reproduction-Immunity Trade-Offs in Insects.  
677 *Annu Rev Entomol* 61: 239-256.
- 678 Scott, B., C. L. Sun, X. Mao, C. Yu, B. P. Vohra *et al.*, 2013 Role of oxygen consumption in hypoxia  
679 protection by translation factor depletion. *J Exp Biol* 216: 2283-2292.
- 680 Scott, B. A., M. S. Avidan and C. M. Crowder, 2002 Regulation of hypoxic death in *C. elegans* by the  
681 insulin/IGF receptor homolog DAF-2. *Science* 296: 2388-2391.
- 682 Semenza, G. L., 2011 Oxygen sensing, homeostasis, and disease. *N Engl J Med* 365: 537-547.
- 683 Semenza, G. L., 2014a Hypoxia-inducible factor 1 and cardiovascular disease. *Annu Rev Physiol* 76:  
684 39-56.
- 685 Semenza, G. L., 2014b Oxygen sensing, hypoxia-inducible factors, and disease pathophysiology. *Annu*  
686 *Rev Pathol* 9: 47-71.
- 687 Short, S. M., M. F. Wolfner and B. P. Lazzaro, 2012 Female *Drosophila melanogaster* suffer reduced  
688 defense against infection due to seminal fluid components. *J Insect Physiol* 58: 1192-1201.
- 689 Sivaraj, K. K., B. Dharmalingam, V. Mohanakrishnan, H. W. Jeong, K. Kato *et al.*, 2020 YAP1 and TAZ  
690 negatively control bone angiogenesis by limiting hypoxia-inducible factor signaling in endothelial  
691 cells. *Elife* 9.
- 692 Slack, C., M. E. Giannakou, A. Foley, M. Goss and L. Partridge, 2011 dFOXO-independent effects of  
693 reduced insulin-like signaling in *Drosophila*. *Aging Cell* 10: 735-748.
- 694 Sriskanthadevan-Pirahas, S., R. Deshpande, B. Lee and S. S. Grewal, 2018 Ras/ERK-signalling  
695 promotes tRNA synthesis and growth via the RNA polymerase III repressor Maf1 in *Drosophila*.  
696 *PLoS Genet* 14: e1007202.
- 697 Steinmetz, E. L., D. N. Dewald and U. Walldorf, 2021 *Drosophila* Homeodomain-Interacting Protein  
698 Kinase (Hipk) Phosphorylates the Hippo/Warts Signalling Effector Yorkie. *Int J Mol Sci* 22.
- 699 Supek, F., M. Bosnjak, N. Skunca and T. Smuc, 2011 REVIGO summarizes and visualizes long lists of  
700 gene ontology terms. *PLoS One* 6: e21800.
- 701 Teleman, A. A., V. Hietakangas, A. C. Sayadian and S. M. Cohen, 2008 Nutritional control of protein  
702 biosynthetic capacity by insulin via Myc in *Drosophila*. *Cell Metab* 7: 21-32.
- 703 Teodoro, R. O., and P. H. O'Farrell, 2003 Nitric oxide-induced suspended animation promotes survival  
704 during hypoxia. *EMBO J* 22: 580-587.

- 705 Tettweiler, G., J. A. Blaquiere, N. B. Wray and E. M. Verheyen, 2019 Hipk is required for JAK/STAT  
706 activity during development and tumorigenesis. PLoS One 14: e0226856.
- 707 Tettweiler, G., M. Miron, M. Jenkins, N. Sonenberg and P. F. Lasko, 2005 Starvation and oxidative  
708 stress resistance in Drosophila are mediated through the eIF4E-binding protein, d4E-BP. Genes  
709 Dev 19: 1840-1843.
- 710 Texada, M. J., A. F. Jorgensen, C. F. Christensen, T. Koyama, A. Malita *et al.*, 2019 A fat-tissue sensor  
711 couples growth to oxygen availability by remotely controlling insulin secretion. Nat Commun 10:  
712 1955.
- 713 van den Beucken, T., M. Koritzinsky and B. G. Wouters, 2006 Translational control of gene expression  
714 during hypoxia. Cancer Biol Ther 5: 749-755.
- 715 Verheyen, E. M., S. Swarup and W. Lee, 2012 Hipk proteins dually regulate Wnt/Wingless signal  
716 transduction. Fly (Austin) 6: 126-131.
- 717 Webb, A. E., and A. Brunet, 2014 FOXO transcription factors: key regulators of cellular quality control.  
718 Trends Biochem Sci 39: 159-169.
- 719 Wingrove, J. A., and P. H. O'Farrell, 1999 Nitric oxide contributes to behavioral, cellular, and  
720 developmental responses to low oxygen in Drosophila. Cell 98: 105-114.
- 721 Wong, D. M., Z. Shen, K. E. Owyang and J. A. Martinez-Agosto, 2014 Insulin- and warts-dependent  
722 regulation of tracheal plasticity modulates systemic larval growth during hypoxia in Drosophila  
723 melanogaster. PLoS One 9: e115297.
- 724 Wong, K. K. L., J. Z. Liao and E. M. Verheyen, 2019 A positive feedback loop between Myc and aerobic  
725 glycolysis sustains tumor growth in a Drosophila tumor model. Elife 8.
- 726 Wu, Z., and K. L. Guan, 2021 Hippo Signaling in Embryogenesis and Development. Trends Biochem  
727 Sci 46: 51-63.
- 728 Zhou, D., J. Xue, J. C. Lai, N. J. Schork, K. P. White *et al.*, 2008 Mechanisms underlying hypoxia  
729 tolerance in Drosophila melanogaster: hairy as a metabolic switch. PLoS Genet 4: e1000221.
- 730

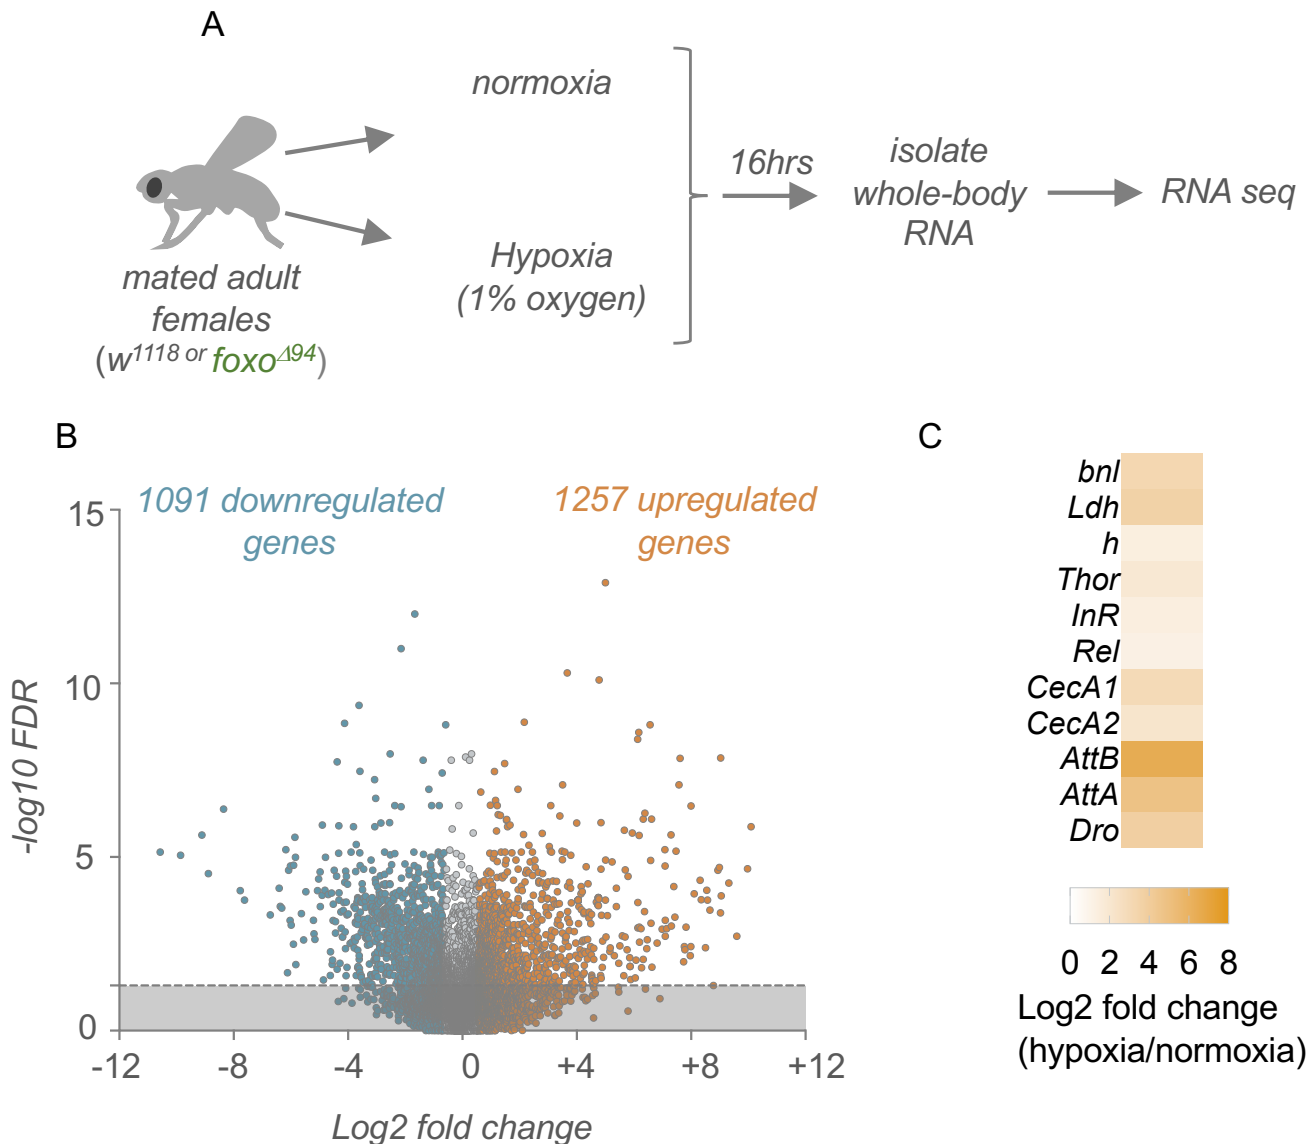

**Figure 1. Hypoxia-induced alterations in whole-body gene expression.** A) Schematic outline of our experimental approach. B) Volcano plot showing the up- (orange) and down-regulated (blue) genes following hypoxia exposure. Genes were considered differentially expressed if they showed a significant ( $q\text{-val}$  (FDR corrected  $p\text{-val}$ )  $< 0.05$ ) change in expression that was  $> \pm 1.5$ -fold different in hypoxia vs normoxia. Dashed line indicates  $q\text{-val} = 0.05$ . C) Heatmap depicting the change in expression (Log<sub>2</sub> fold change, hypoxia vs normoxia conditions) of previously described hypoxia-induced genes.

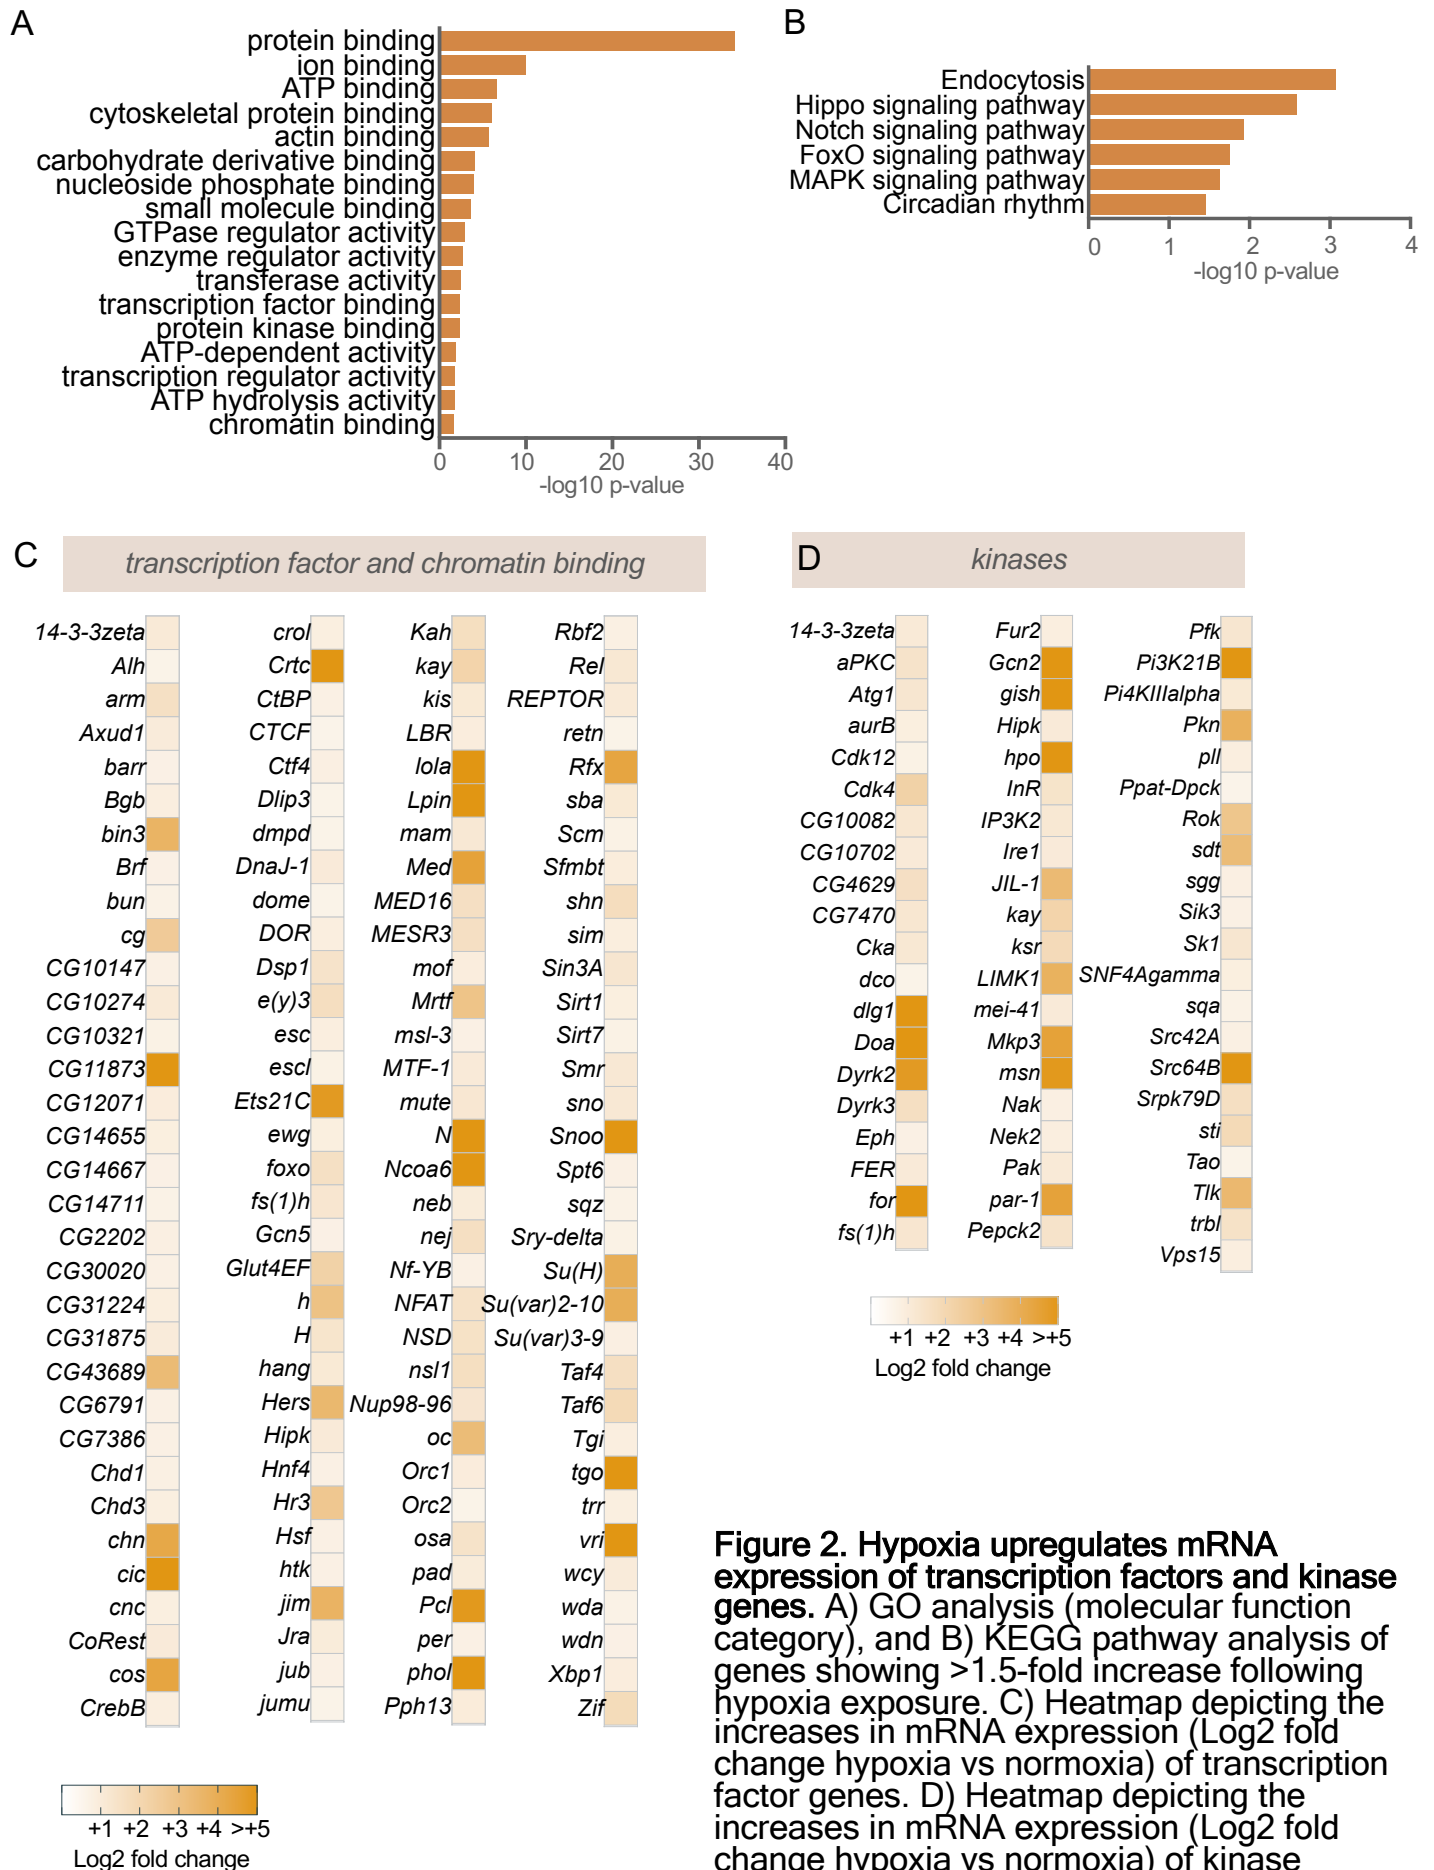

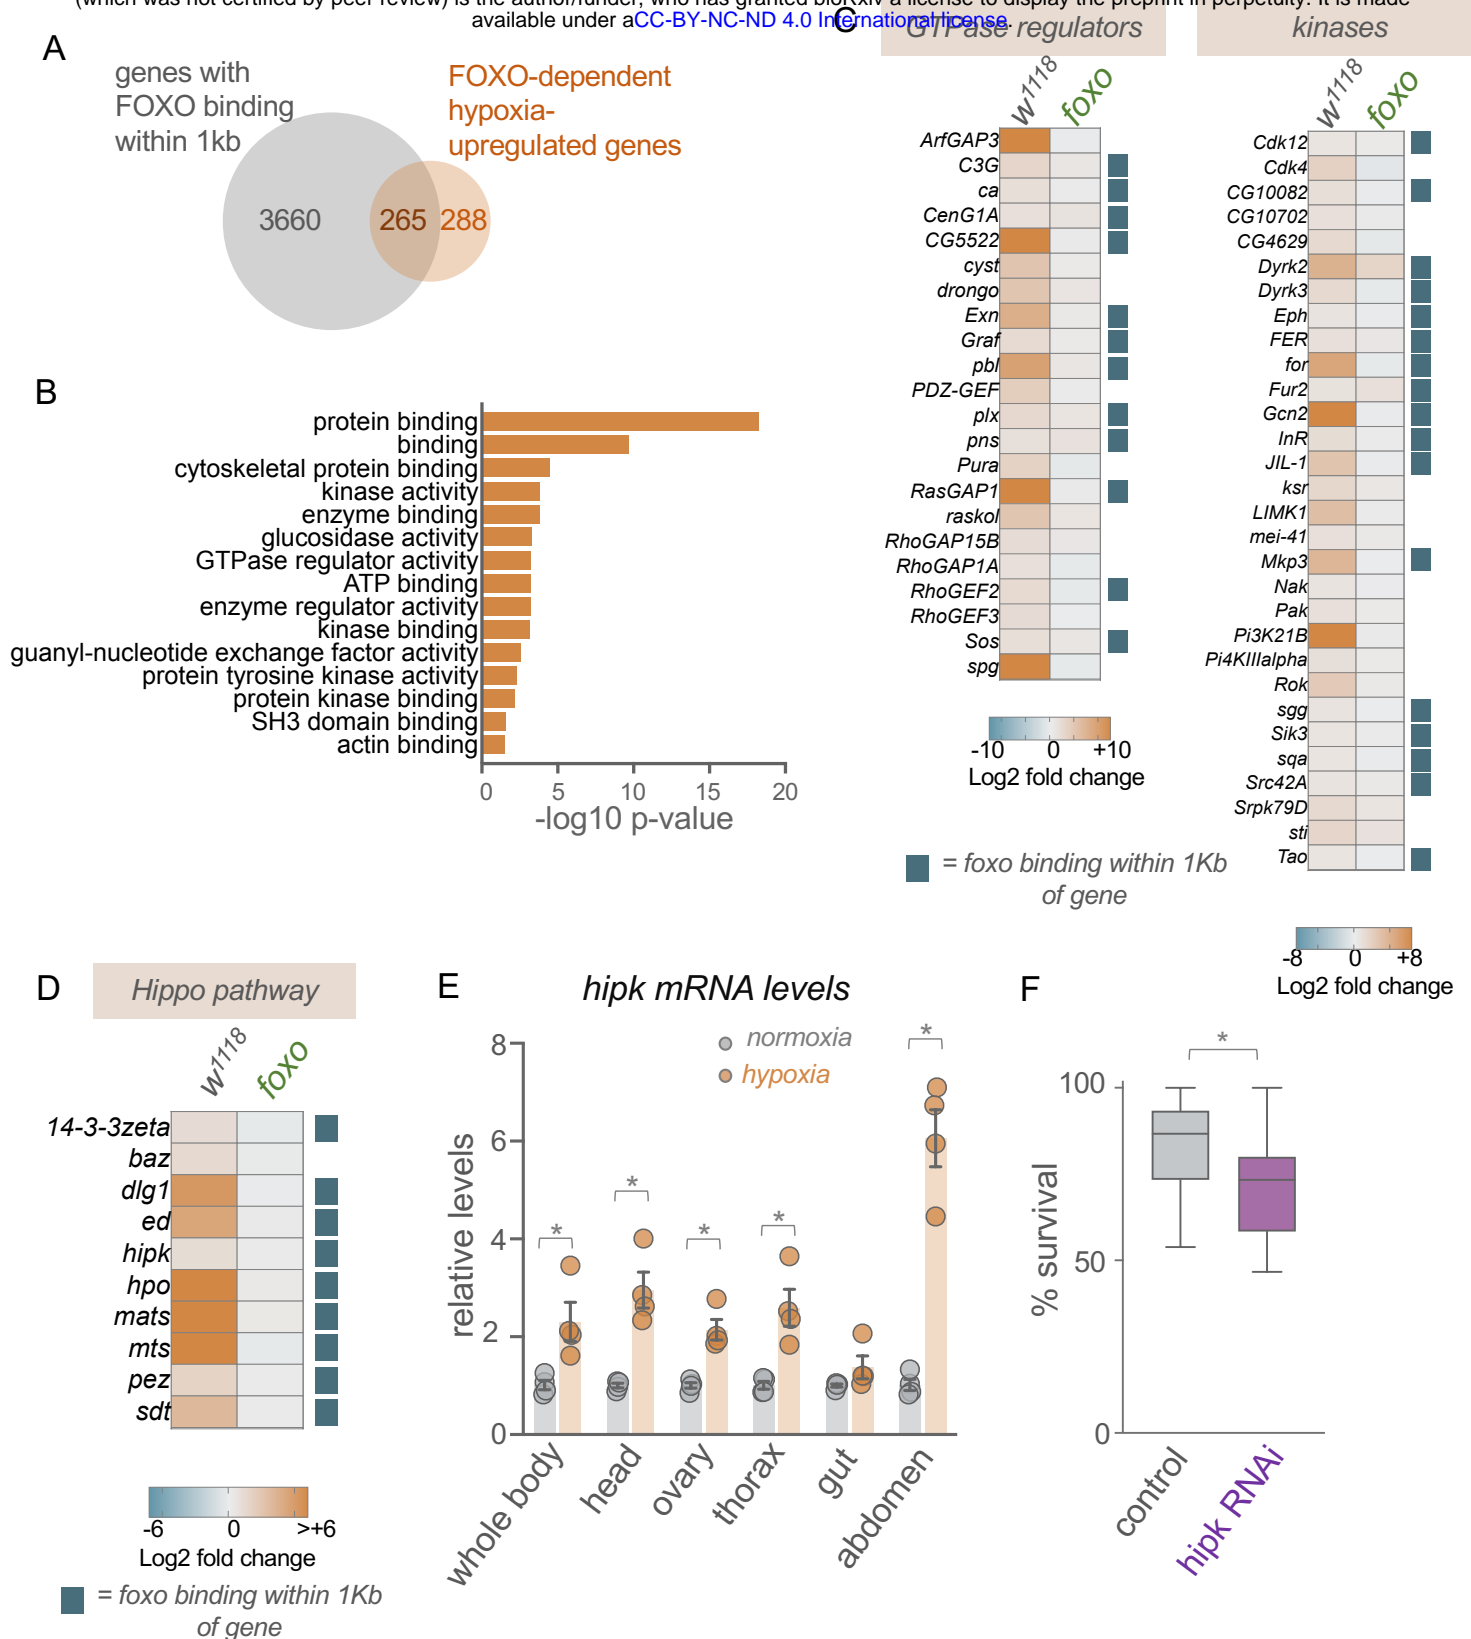

**Figure 3. Hipk is a hypoxia-induced gene required for organismal hypoxia tolerance.** A) Venn diagram showing overlap between genes previously shown to have FOXO binding within 1kb, as detected by ChIP, and FOXO-dependent upregulated genes identified in the present study. B) GO analysis (molecular function category) of FOXO-dependent hypoxia induced genes (genes showing a significant >1.5-fold increase in mRNA expression following hypoxia exposure in *w<sup>1118</sup>* but not *foxo* mutants). C) Heatmap depicting the increases in mRNA expression (Log<sub>2</sub> fold change, hypoxia vs normoxia) of GTPase regulators and kinases in *w<sup>1118</sup>* and *foxo* mutants. Blue squares indicate genes previously shown to have FOXO binding within 1kb of the gene as measured by ChIP. D) Heatmap depicting the increases in mRNA expression (Log<sub>2</sub> fold change, hypoxia vs normoxia) of Hippo pathway genes in *w<sup>1118</sup>* and *foxo* mutants. Blue squares indicate genes previously shown to have FOXO binding within 1kb of the gene as measured by ChIP. E) qPCR analysis of *hipk* mRNA levels from normoxia vs hypoxia exposed animals. RNA was isolated from either whole animals or specific tissues. Bars represent mean  $\pm$  SEM. Symbols represent individual data points, n=4 per condition. \* p<0.05, Students t-test. F) Hypoxia survival of control (*daGSG > hipk RNAi*, no RU486) vs *hipk* RNAi (*daGSG > hipk RNAi*, RU486-treated) adult flies. Data are presented as box plots (25%, median and 75% values) with error bars indicating the min and max values, n = 14 groups of flies per condition.

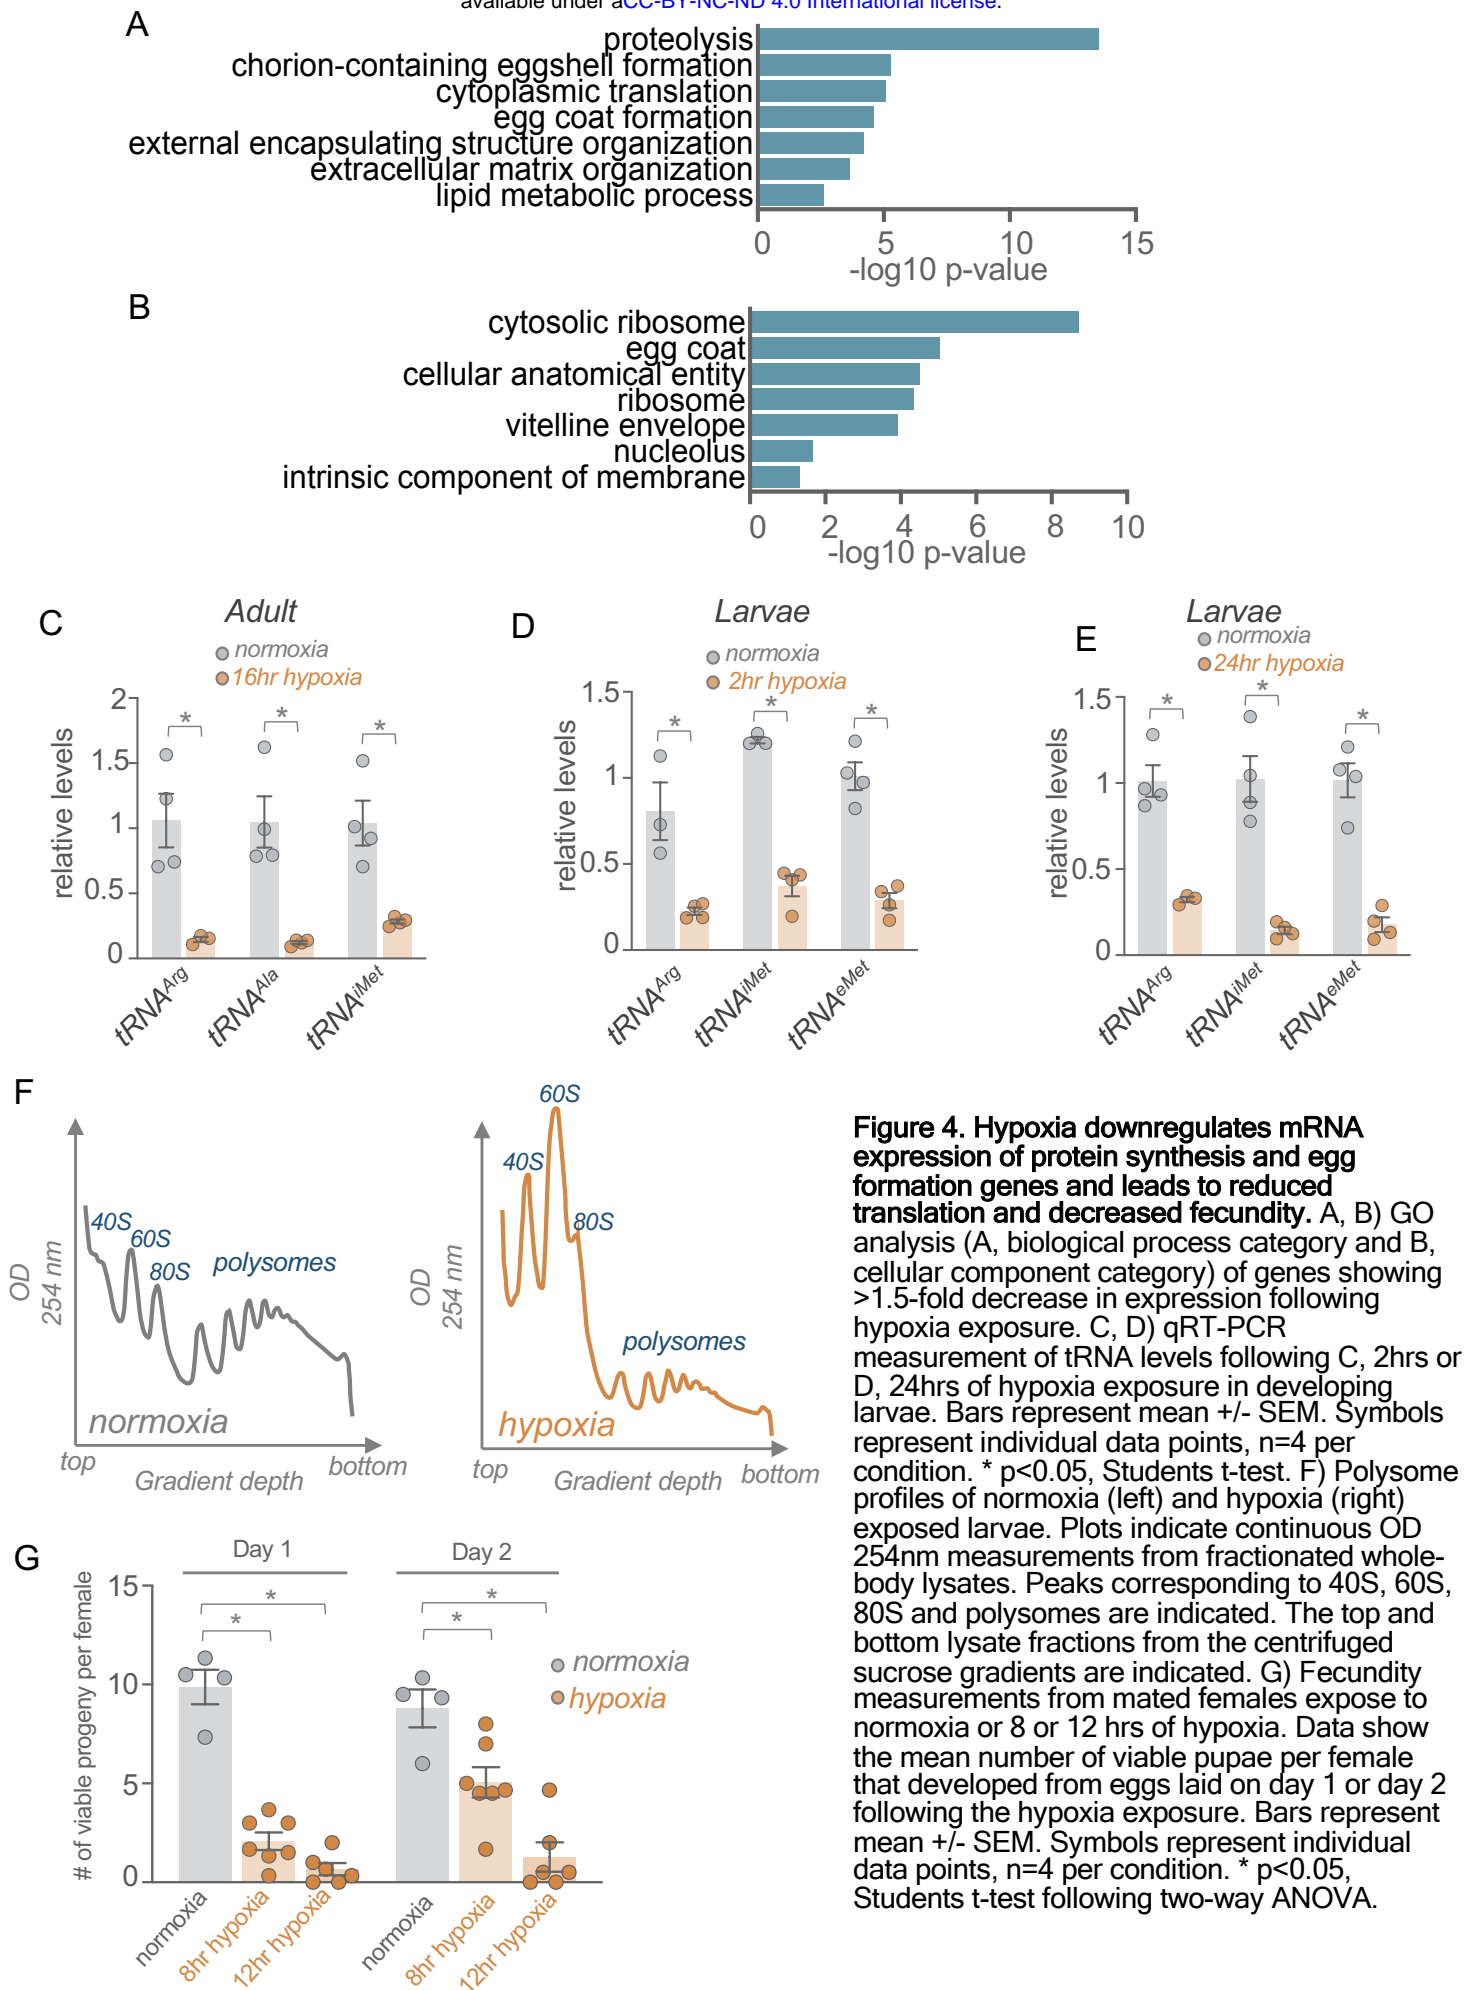

**Figure 4. Hypoxia downregulates mRNA expression of protein synthesis and egg formation genes and leads to reduced translation and decreased fecundity.** A, B) GO analysis (A, biological process category and B, cellular anatomical category) of genes showing >1.5-fold decrease in expression following hypoxia exposure. C, D) qRT-PCR measurement of tRNA levels following C, 2hrs or D, 24hrs of hypoxia exposure in developing larvae. Bars represent mean  $\pm$  SEM. Symbols represent individual data points, n=4 per condition. \* p<0.05, Students t-test. F) Polysome profiles of normoxia (left) and hypoxia (right) exposed larvae. Plots indicate continuous OD 254nm measurements from fractionated whole-body lysates. Peaks corresponding to 40S, 60S, 80S and polysomes are indicated. The top and bottom lysate fractions from the centrifuged sucrose gradients are indicated. G) Fecundity measurements from mated females expose to normoxia or 8 or 12 hrs of hypoxia. Data show the mean number of viable pupae per female that developed from eggs laid on day 1 or day 2 following the hypoxia exposure. Bars represent mean  $\pm$  SEM. Symbols represent individual data points, n=4 per condition. \* p<0.05, Students t-test following two-way ANOVA.



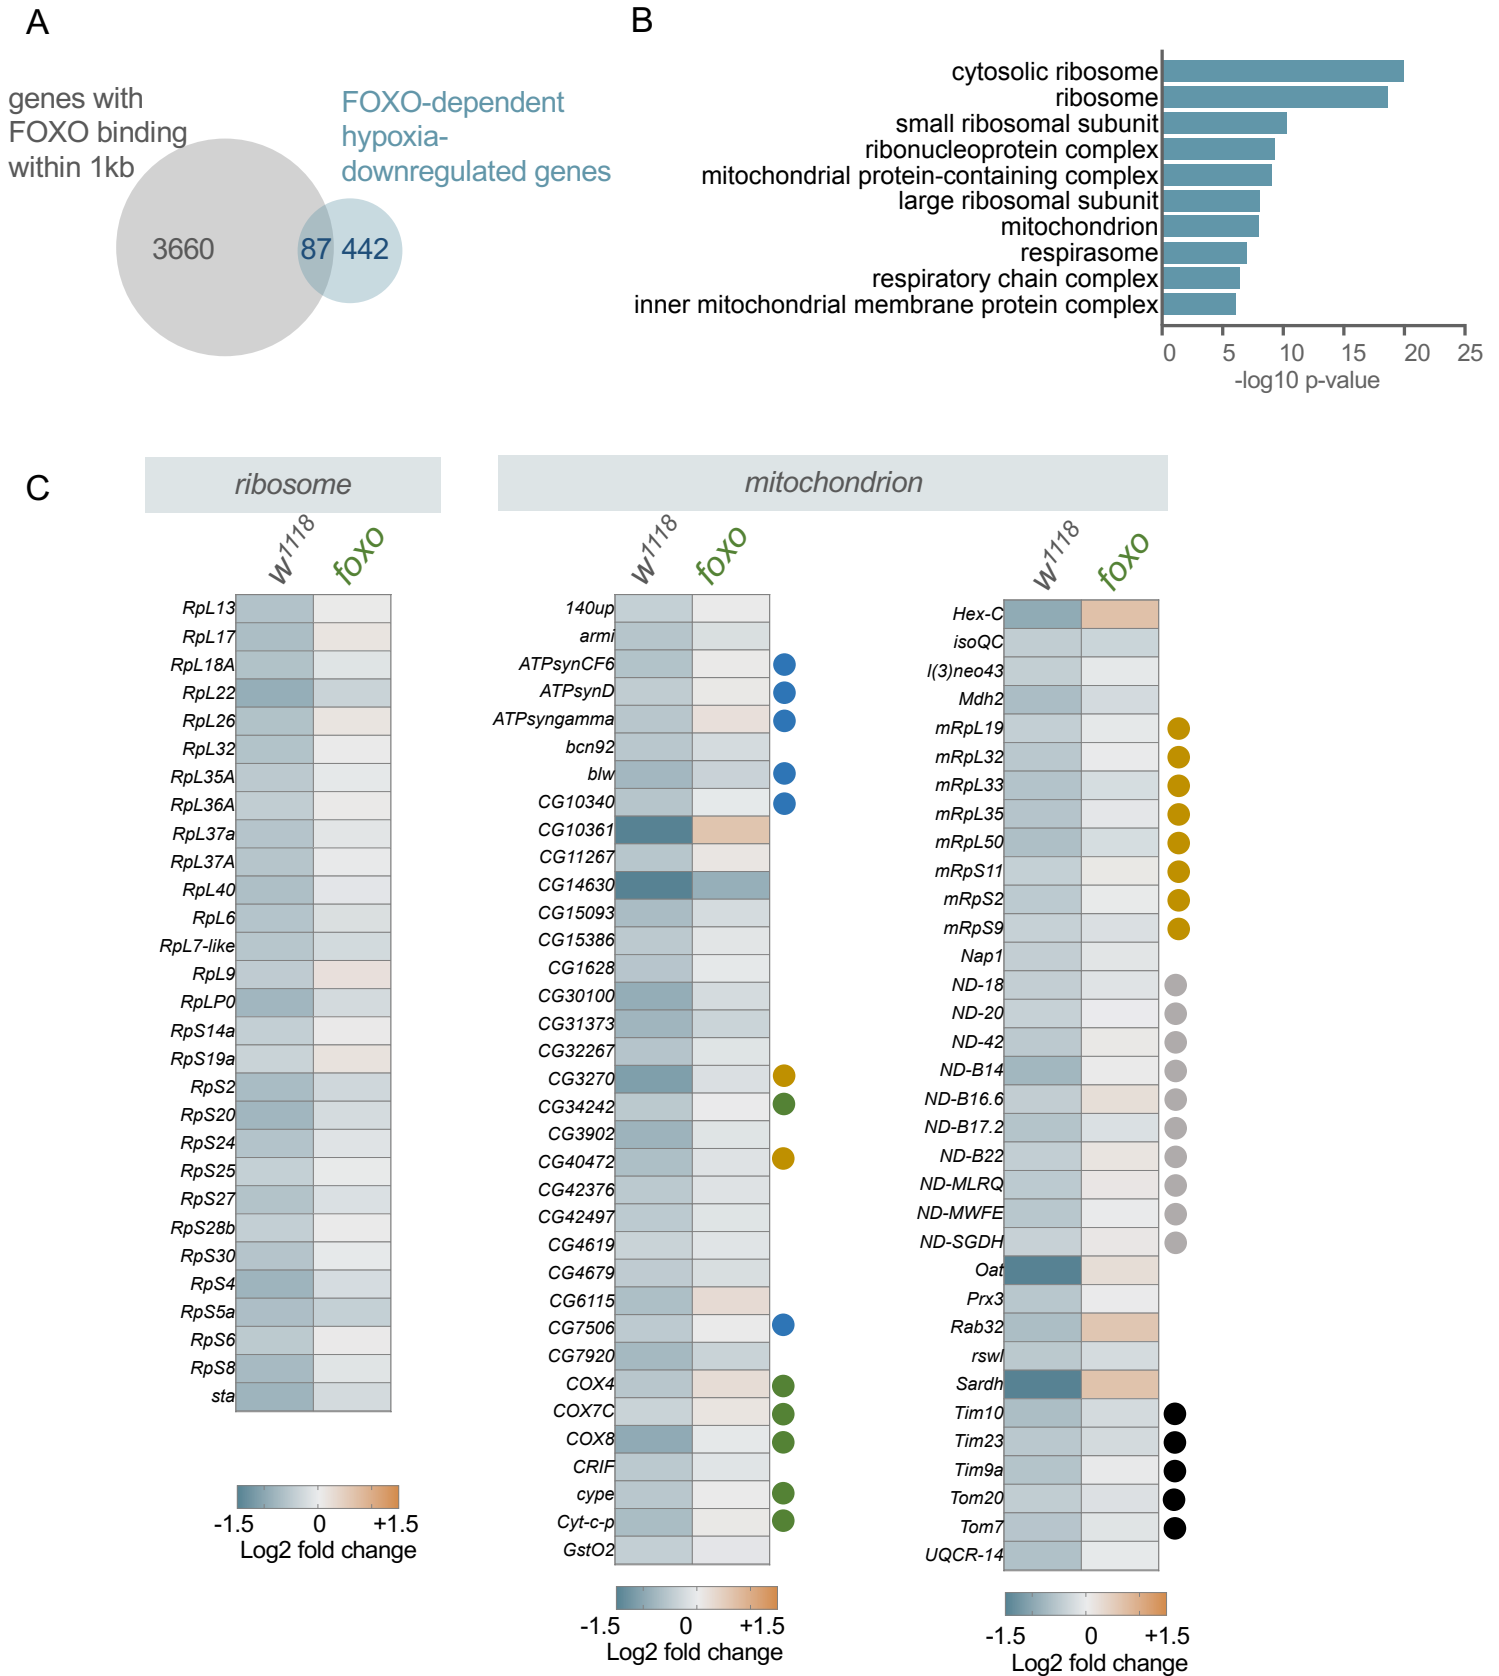

**Figure 5. Hypoxia downregulation of ribosomal protein and mitochondrial regulator gene expression requires FOXO.** A) GO analysis (cell component category) of FOXO-dependent hypoxia suppressed genes (genes showing a significant decrease in mRNA expression following hypoxia exposure in *w<sup>1118</sup>* but not *foxo* mutants). B) Heatmap depicting the decreases in mRNA expression (Log<sub>2</sub> fold change, hypoxia vs normoxia) of ribosomal protein genes and mitochondrial regulator genes in *w<sup>1118</sup>* and *foxo* mutants. Colored circles indicate different classes of mitochondrial genes (blue: ATP synthase subunits; orange: mitochondrial ribosomal proteins; green: Cytochrome C oxidase subunits; grey: Complex I subunits; black: mitochondrial transporters).
